# Supplementary material for: Genome-Wide Association Study with Targeted and Non-targeted NMR Metabolomics Identifies 15 Novel Loci of Urinary Human Metabolic Individuality
Source: PubMed Central journal article supplement (PMC4564198; doi:10.1371/journal.pgen.1005487), 2015-09-09

# GWAS with **targeted** metabolic traits - **CPS1** locus

## Associations with Glycine/Threonine

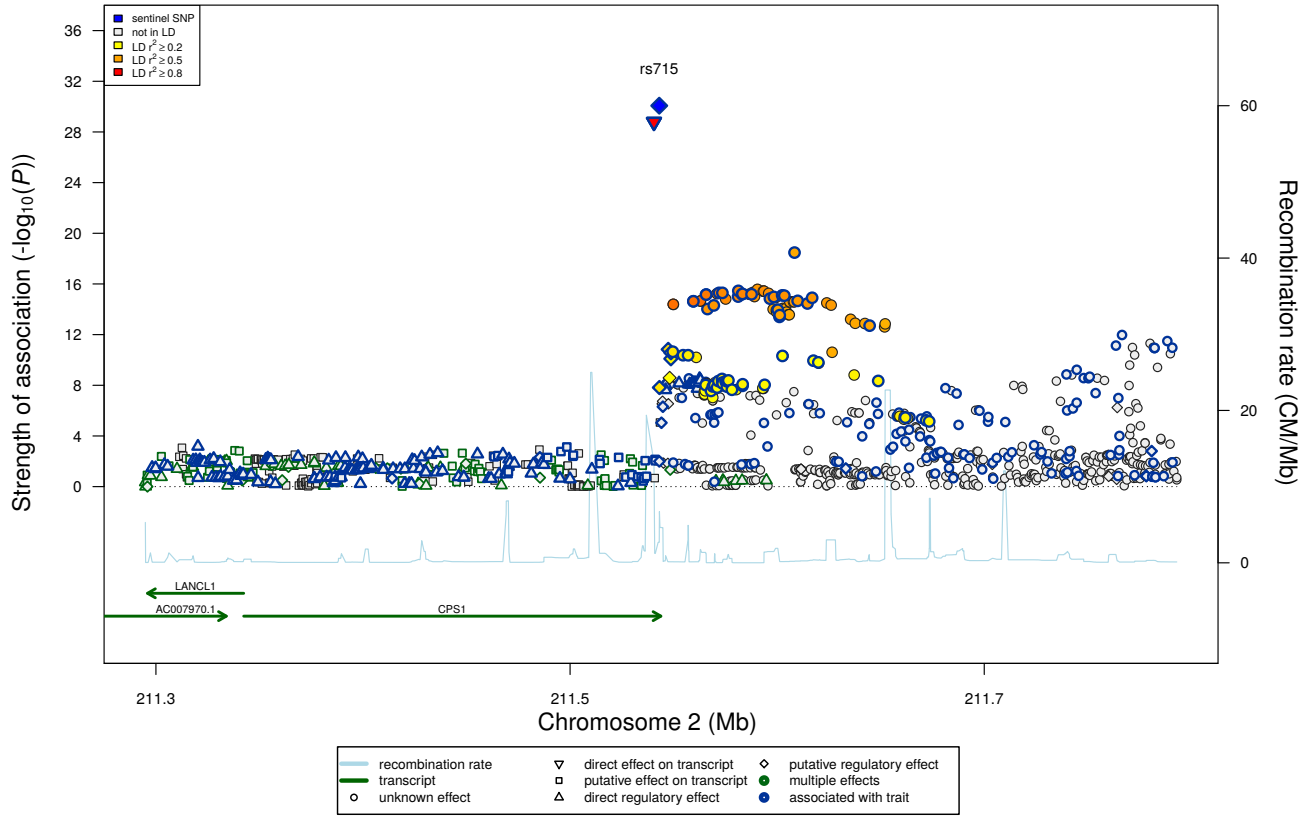

Genotype of rs715

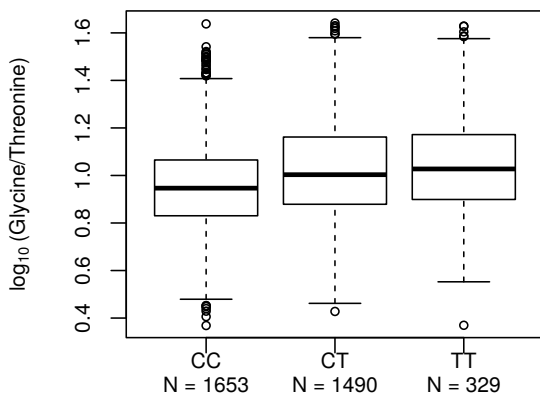

Genome-wide associations with Glycine/Threonine

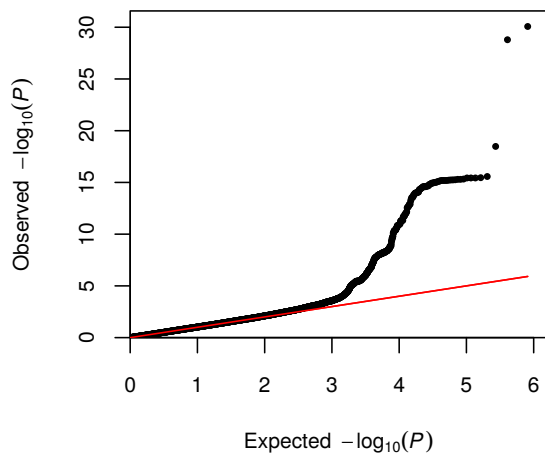

# GWAS with **targeted** metabolic traits - **XYLB** locus

## Associations with Glycolate

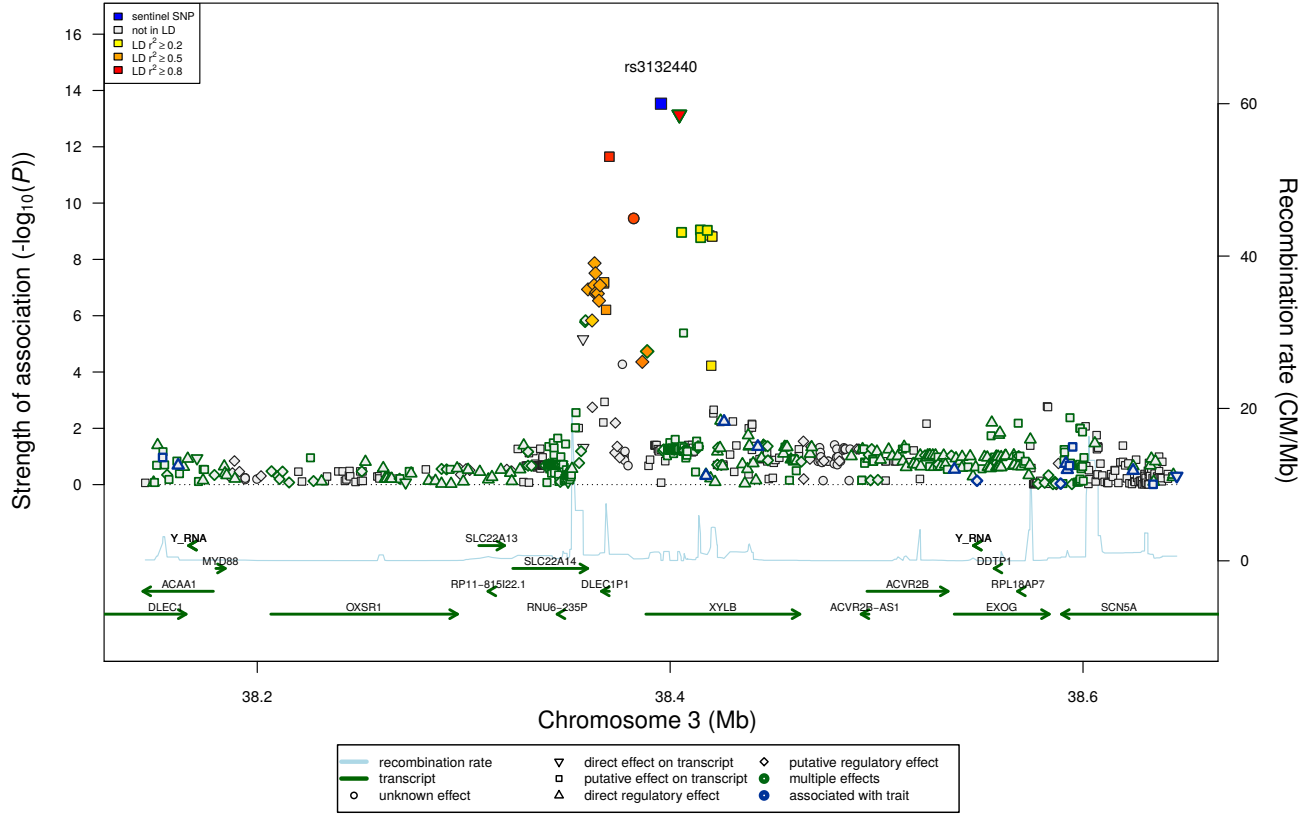

Genotype of rs3132440

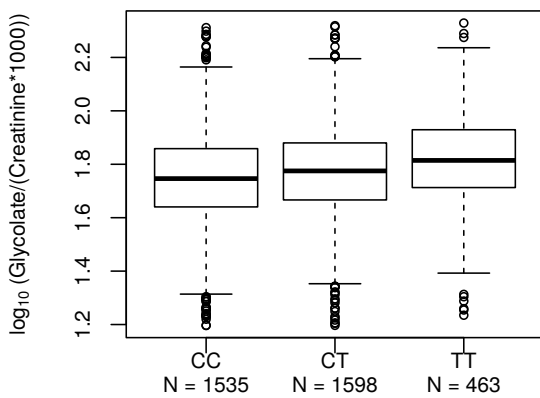

Genome-wide associations with Glycolate

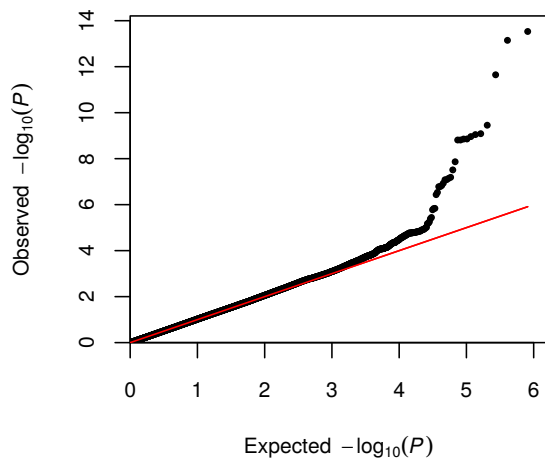

# GWAS with **targeted** metabolic traits - **SLC6A20** locus

## Associations with N,N-Dimethylglycine/Alanine

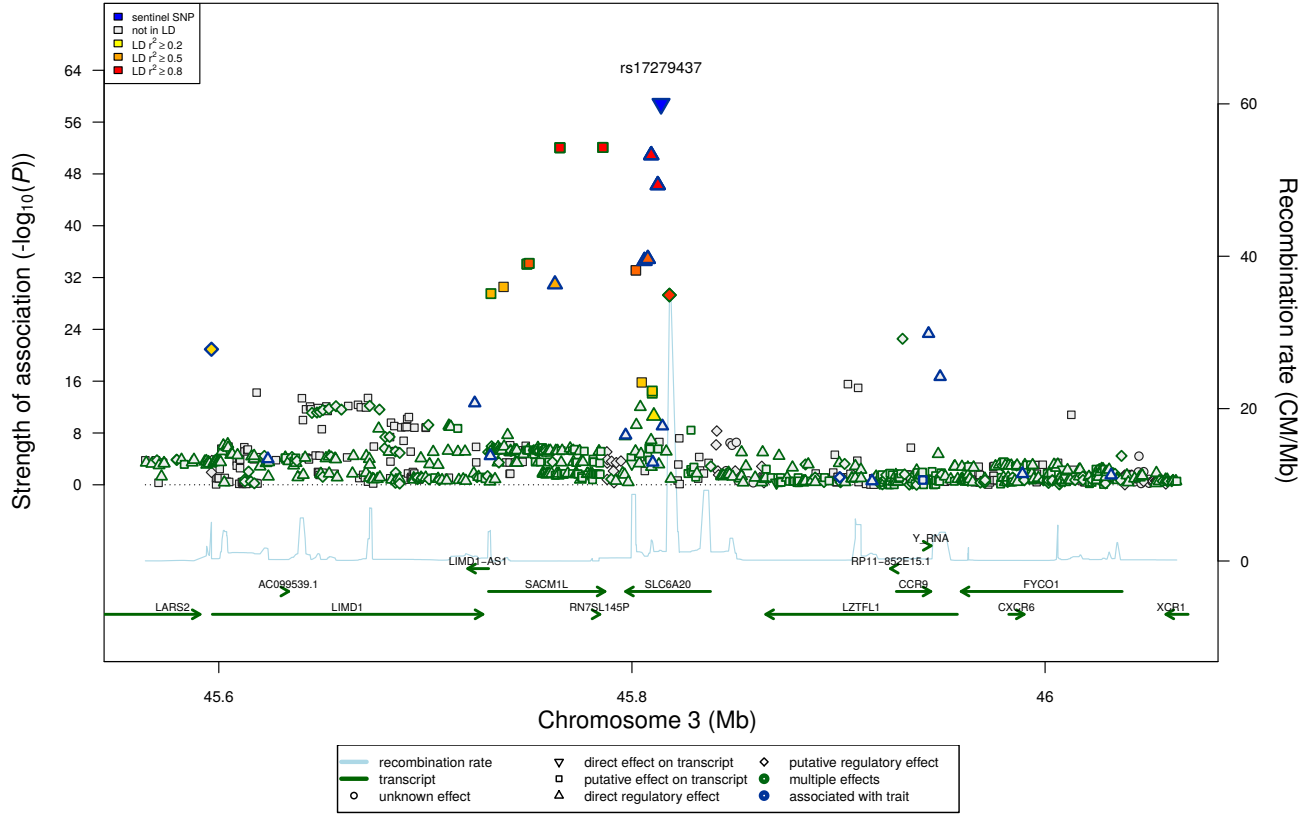

Genotype of rs17279437

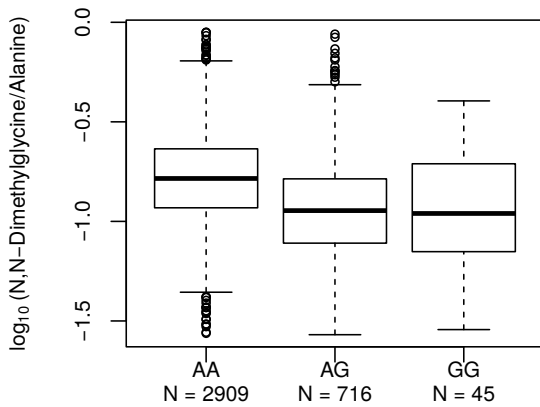

Genome-wide associations with N,N-Dimethylglycine/Alanine

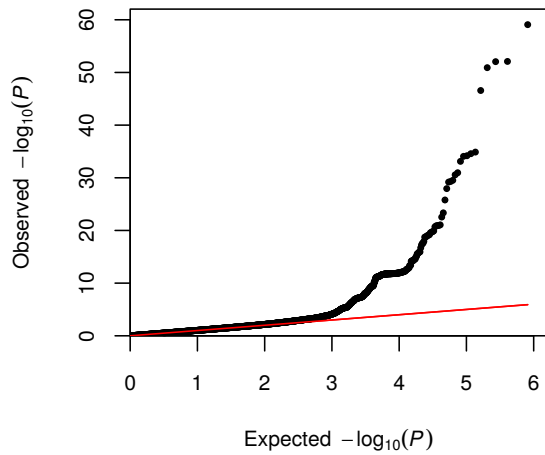

# GWAS with **targeted** metabolic traits - **ETNPPL** locus

## Associations with Ethanolamine

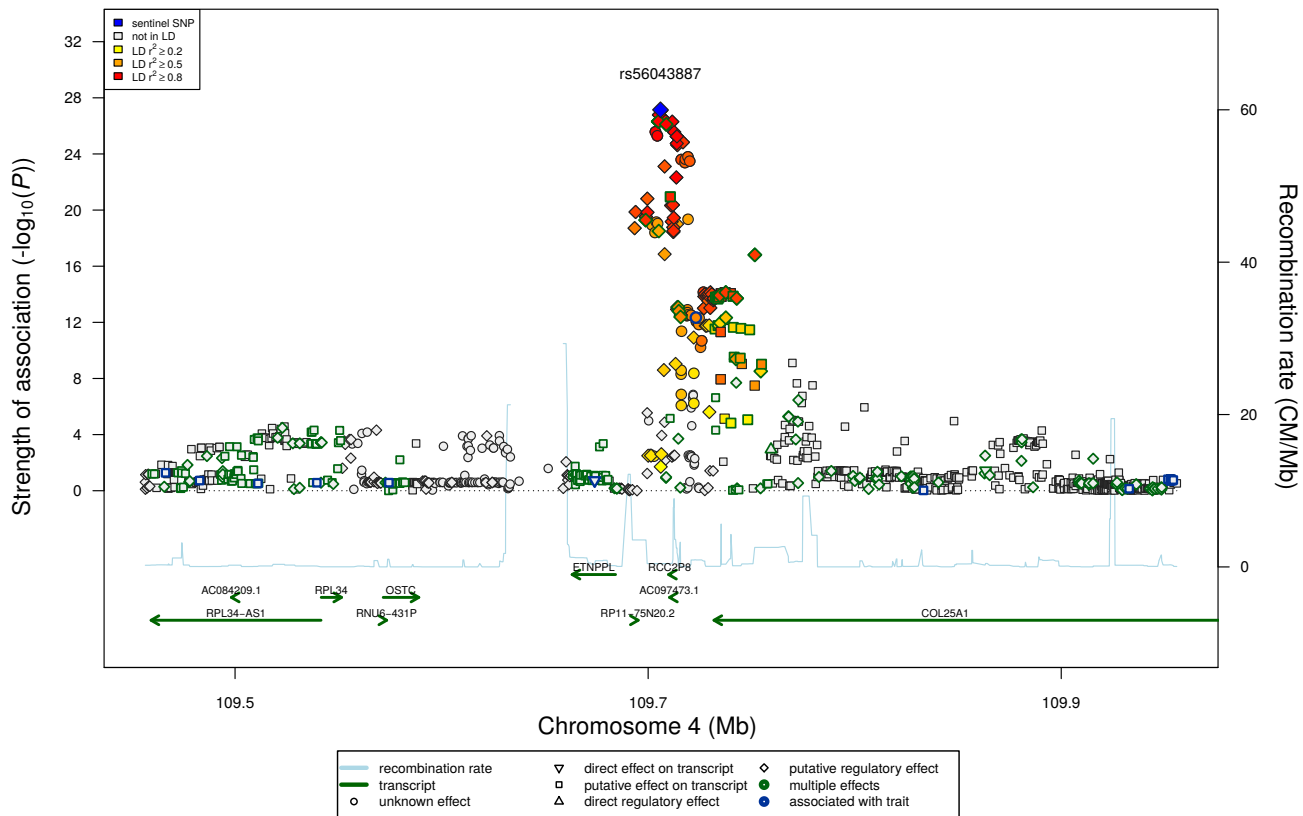

Genotype of rs56043887

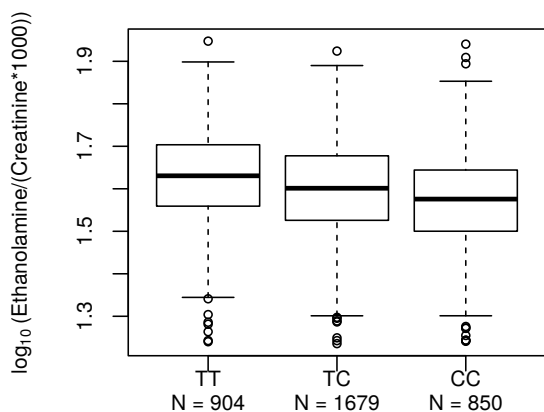

Genome-wide associations with Ethanolamine

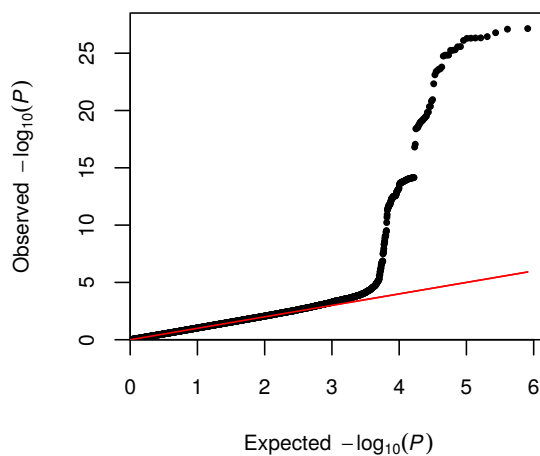

# GWAS with **targeted** metabolic traits - **SLC6A19** locus

## Associations with Histidine/tau-Methylhistidine

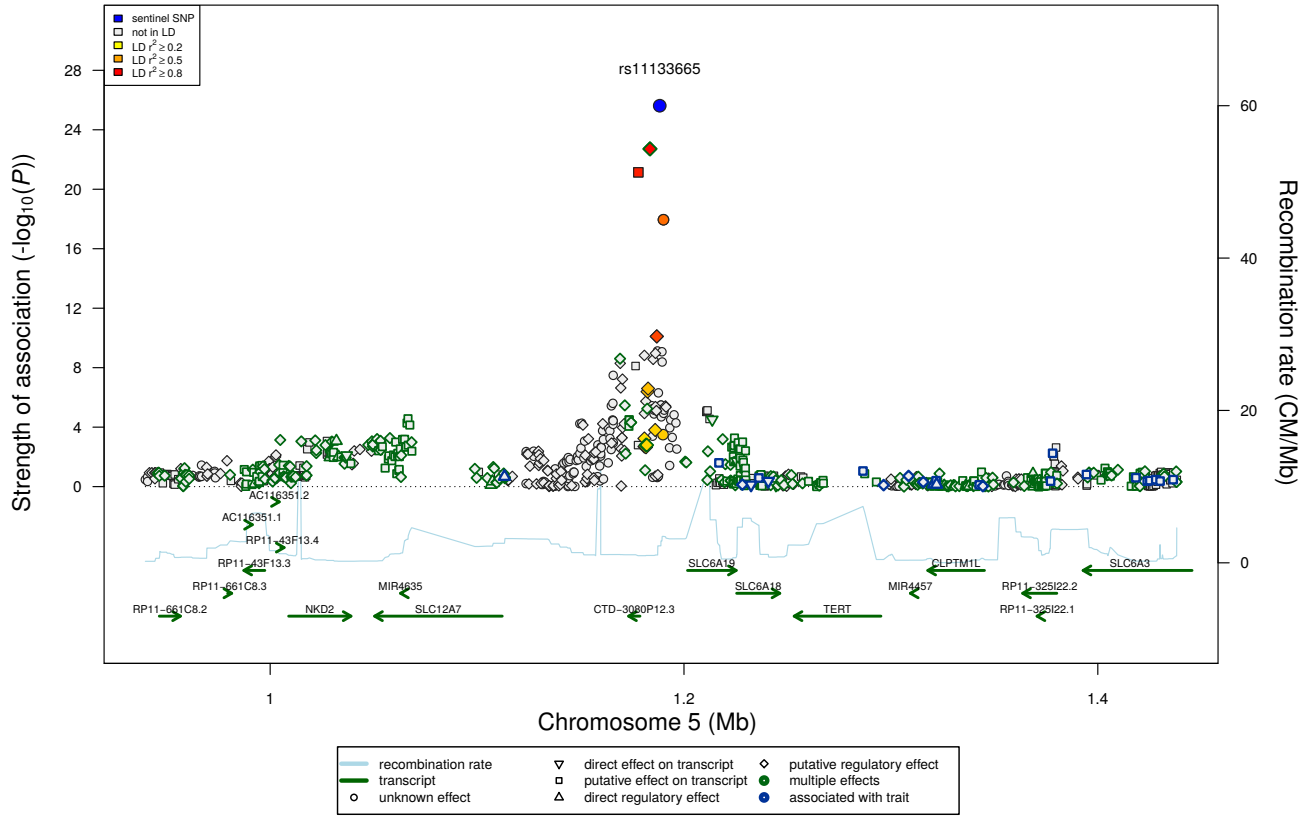

Genotype of rs11133665

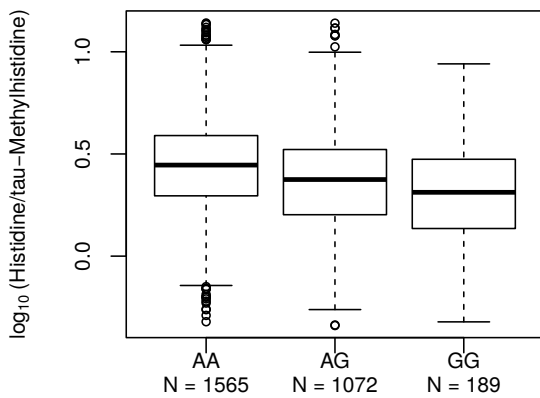

Genome-wide associations with Histidine/tau-Methylhistidine

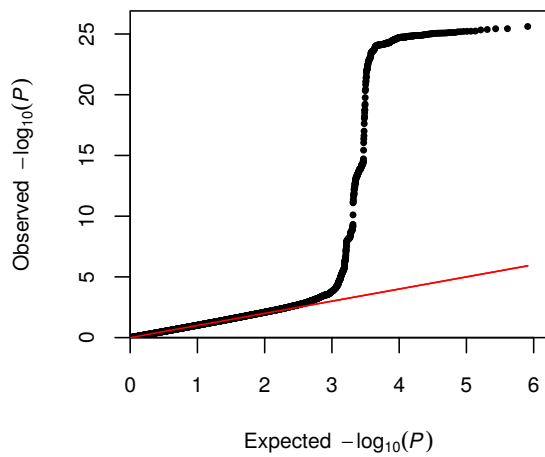

# GWAS with **targeted** metabolic traits - **AGXT2** locus

## Associations with 3-Aminoisobutyrate

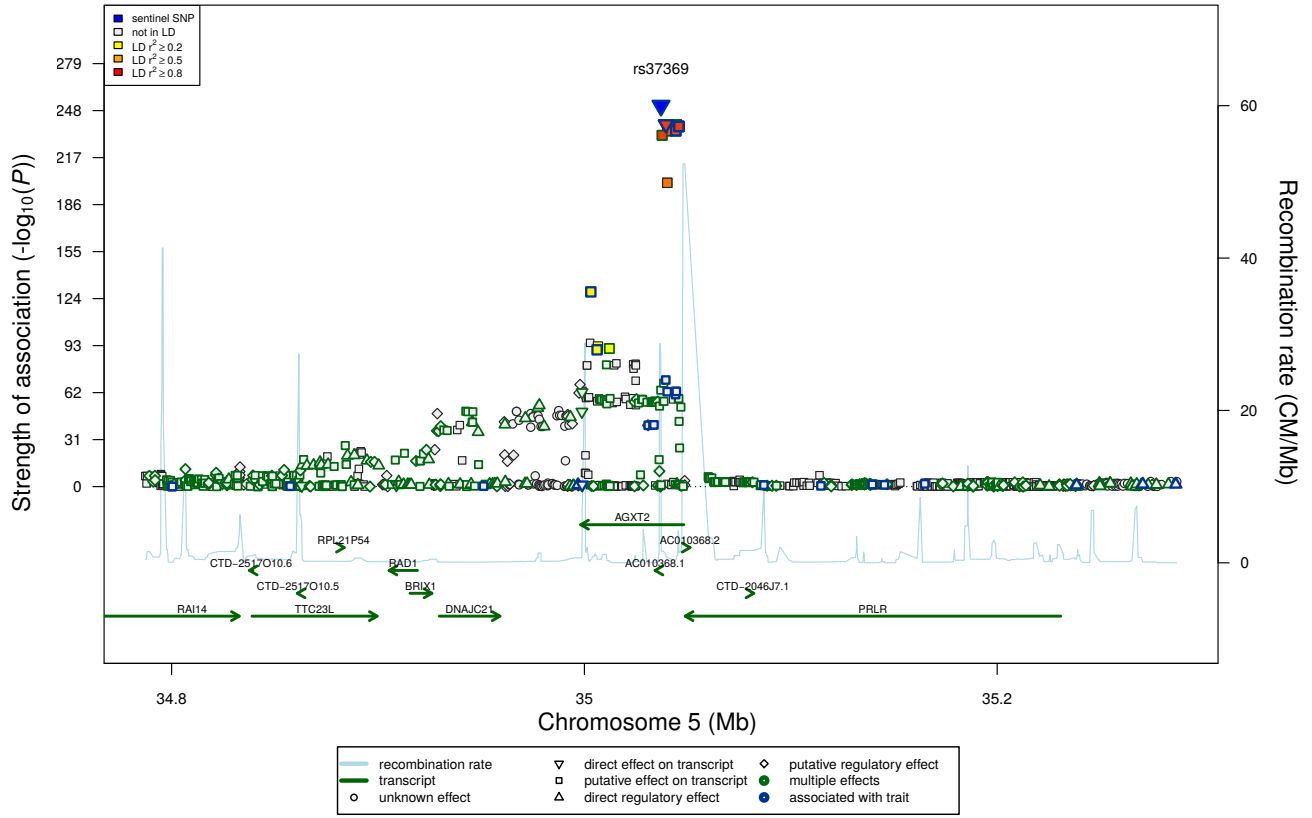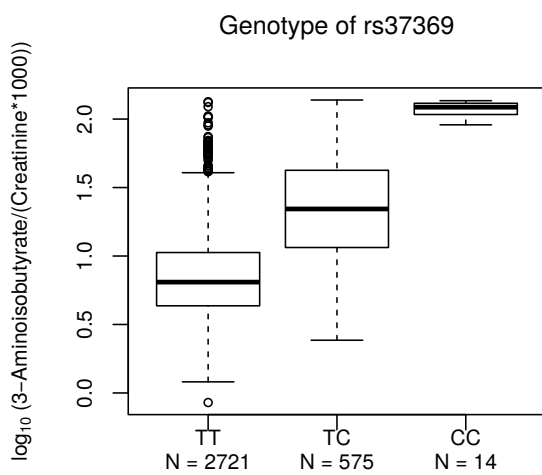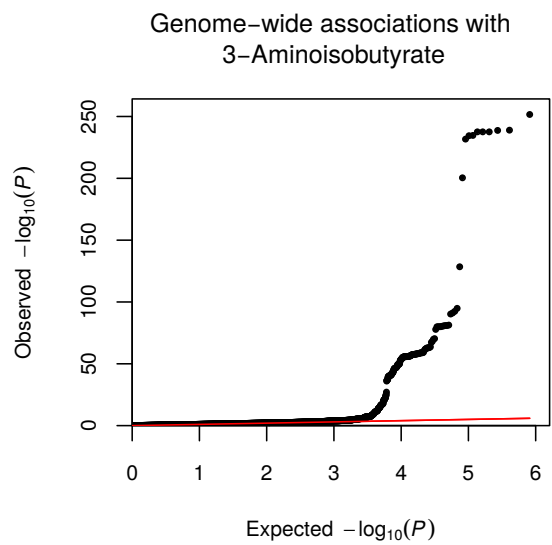

# GWAS with **targeted** metabolic traits - **DMGDH** locus

## Associations with N,N-Dimethylglycine/Betaine

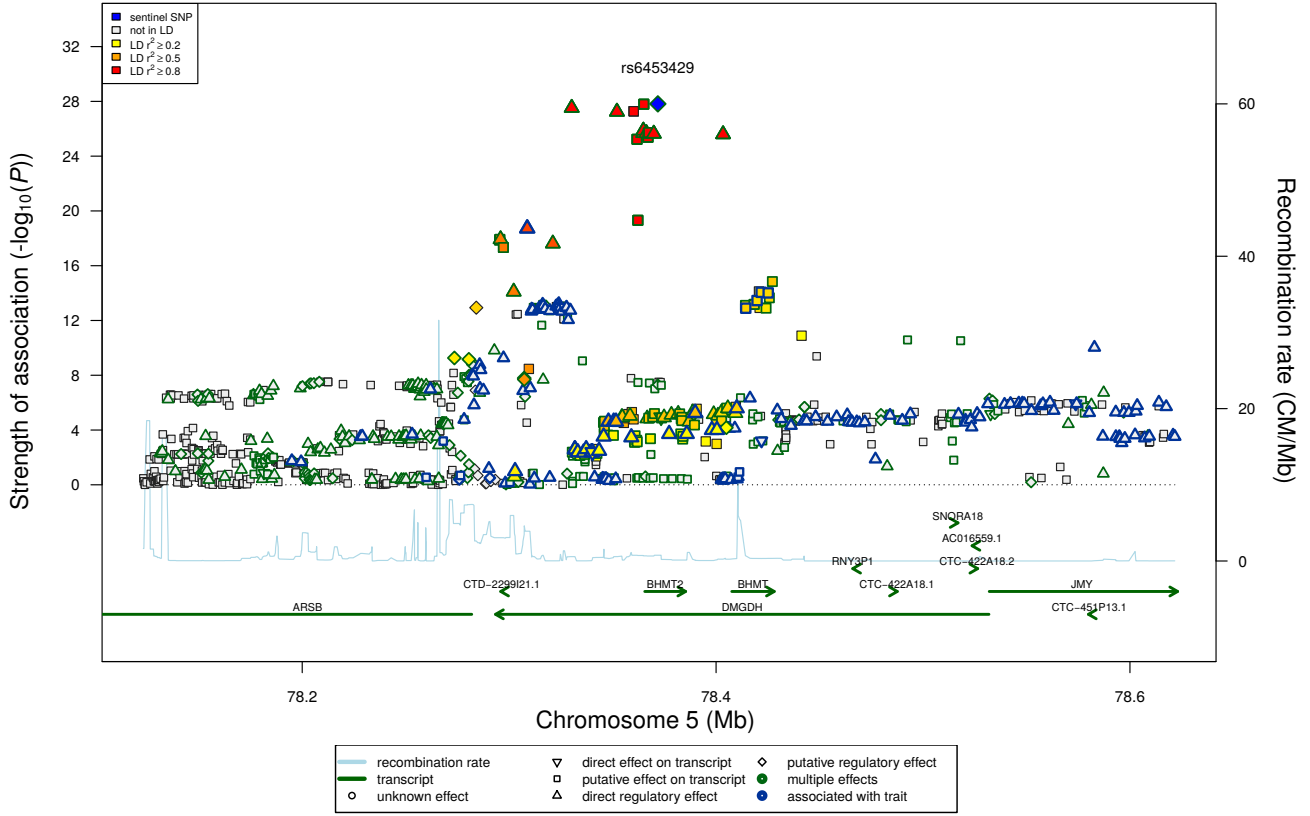

Genotype of rs6453429

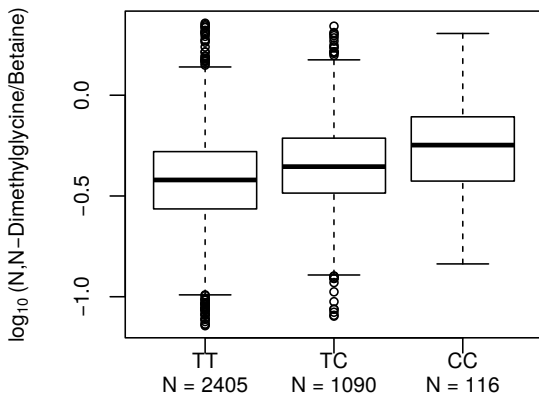

Genome-wide associations with N,N-Dimethylglycine/Betaine

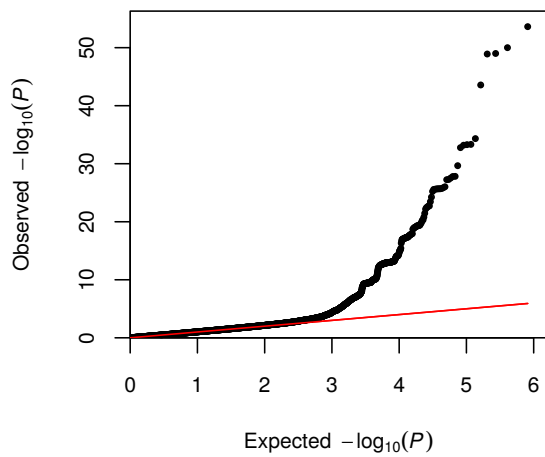

# GWAS with **targeted** metabolic traits - **SLC36A2** locus

## Associations with Glycine/Citrate

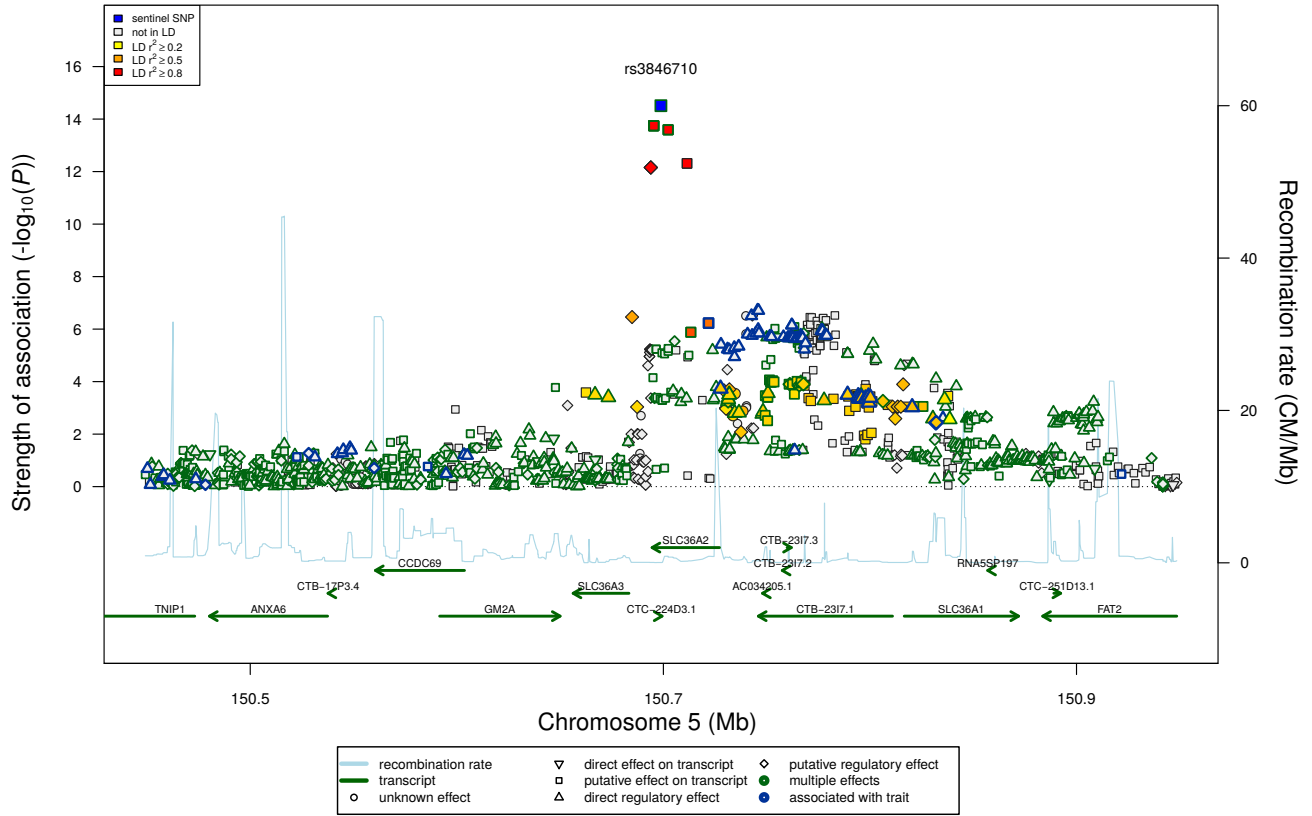

Genotype of rs3846710

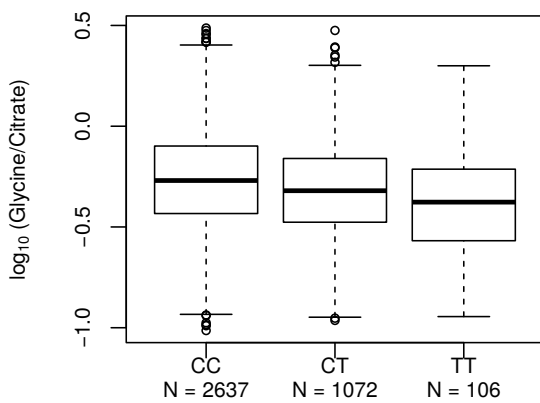

Genome-wide associations with Glycine/Citrate

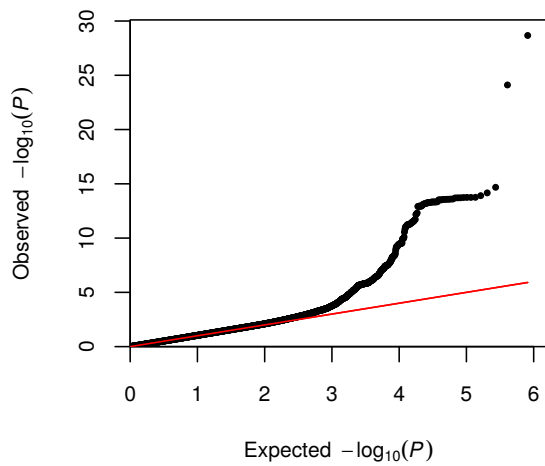



# GWAS with **targeted** metabolic traits - **NAT2** locus

## Associations with Formate/Acetate

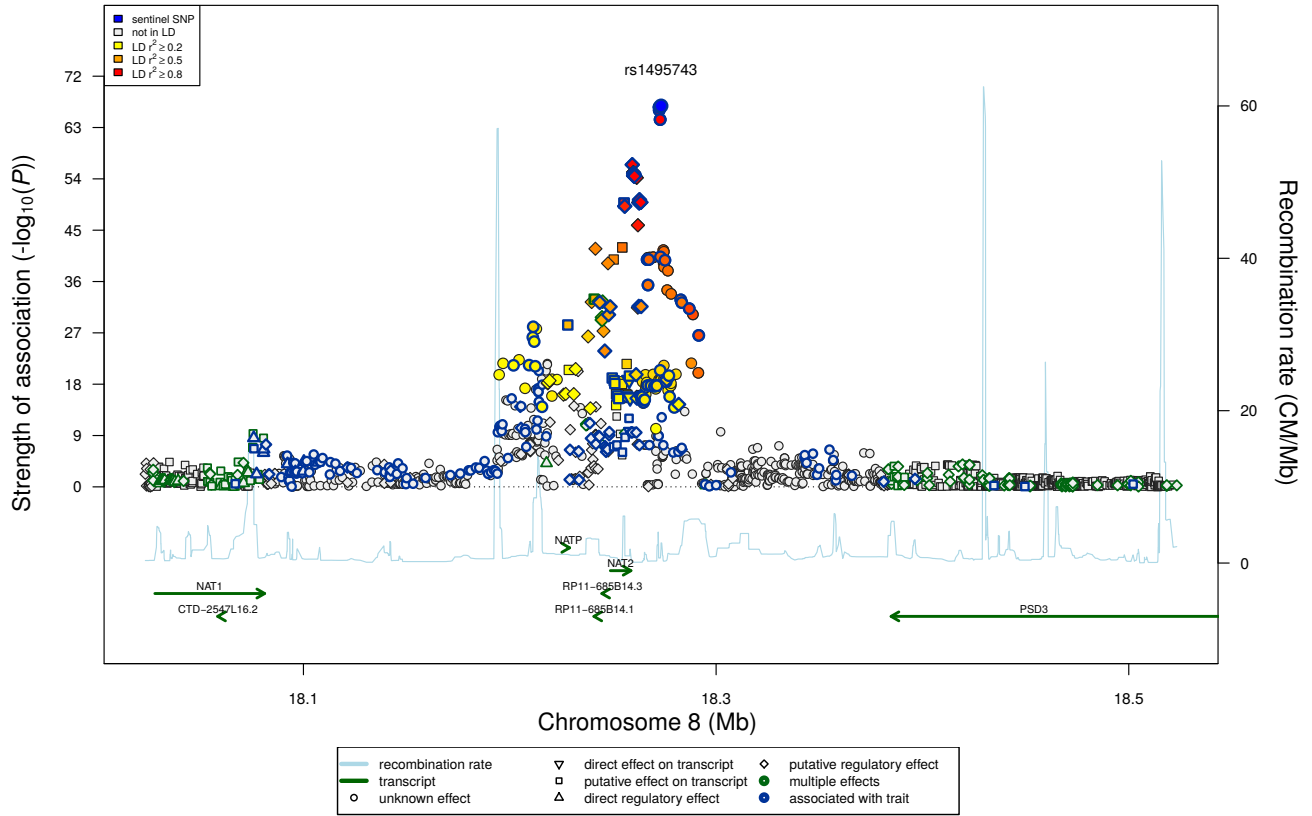

Genotype of rs1495743

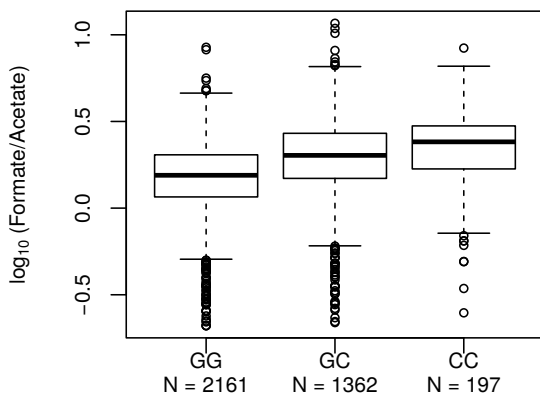

Genome-wide associations with Formate/Acetate

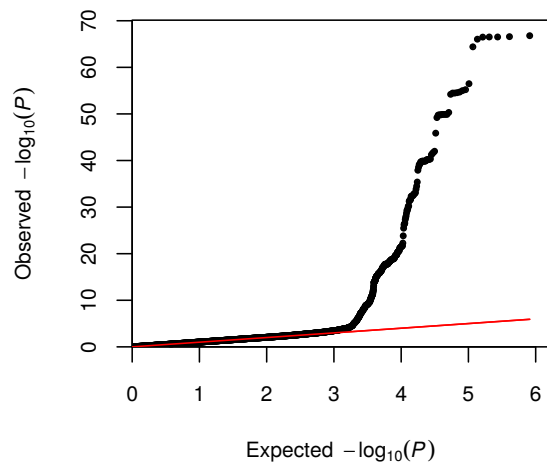



# GWAS with **targeted** metabolic traits - **SLC6A13** locus

## Associations with 3-Aminoisobutyrate

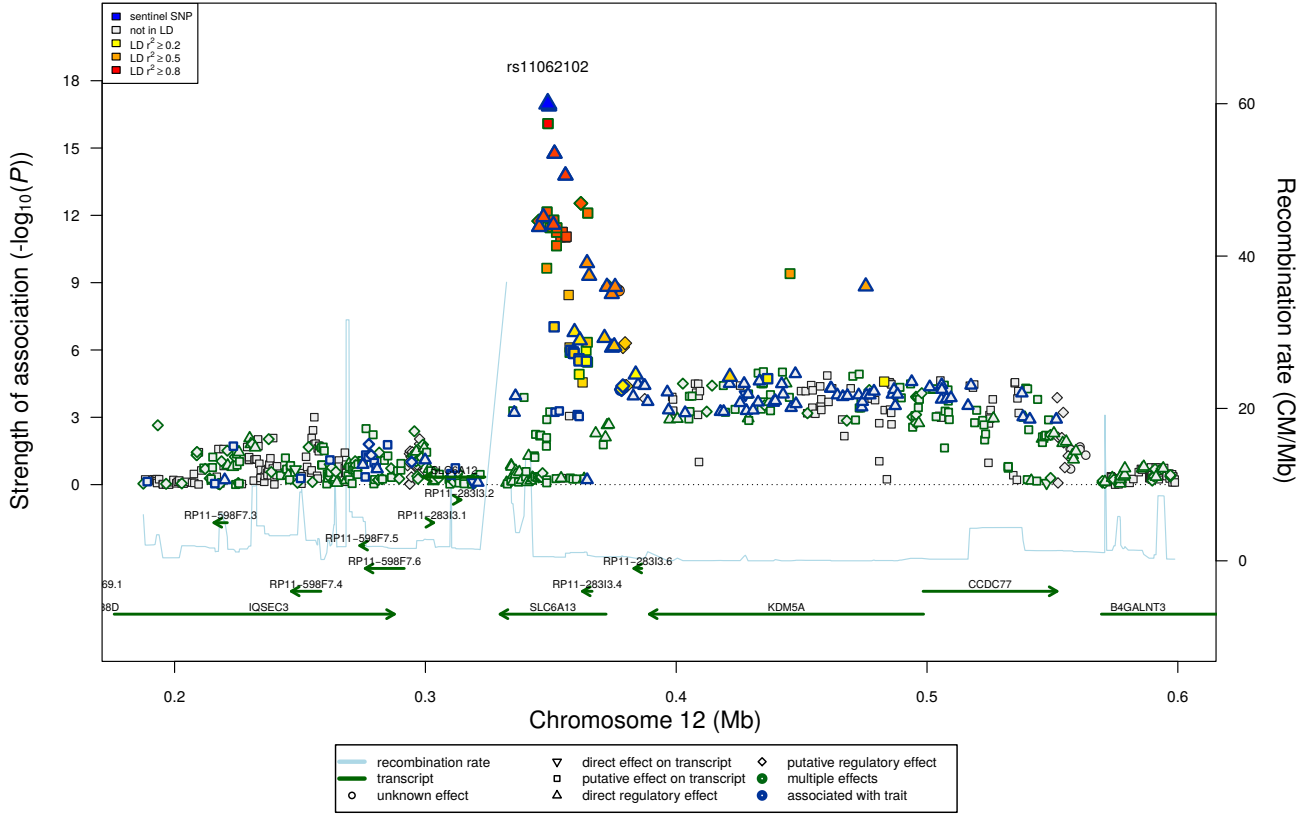

Genotype of rs11062102

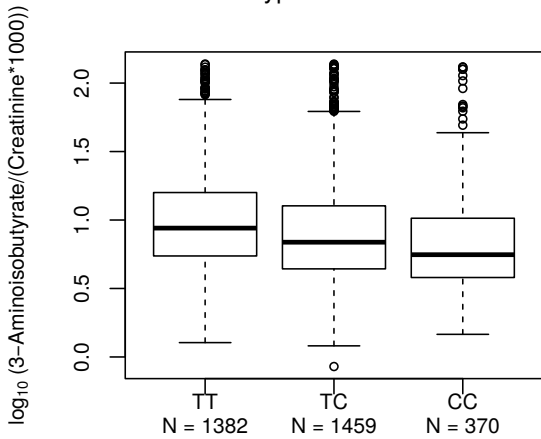

Genome-wide associations with 3-Aminoisobutyrate

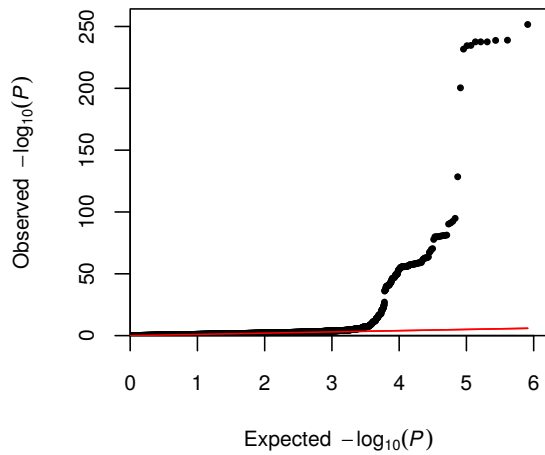

# GWAS with **targeted** metabolic traits - **HPD** locus

## Associations with 2-Hydroxyisobutyrate

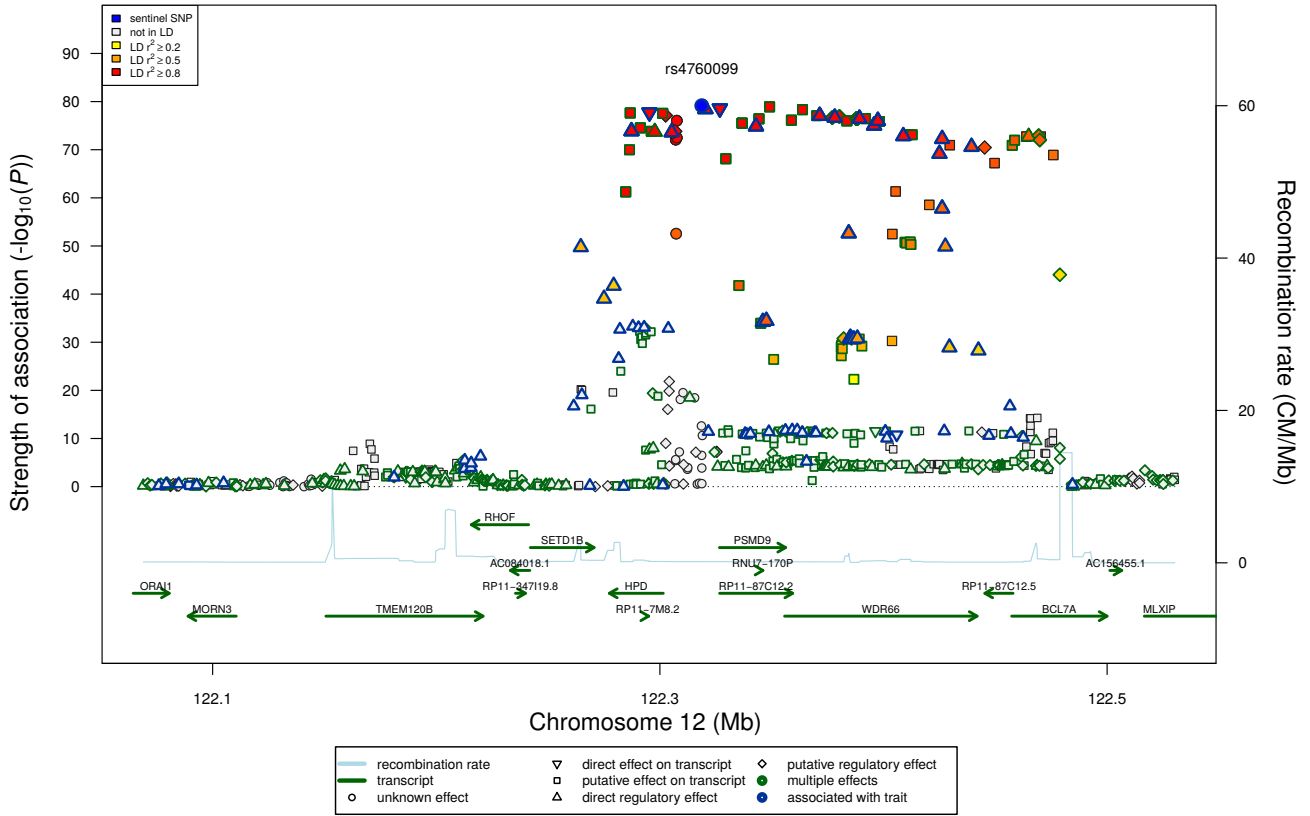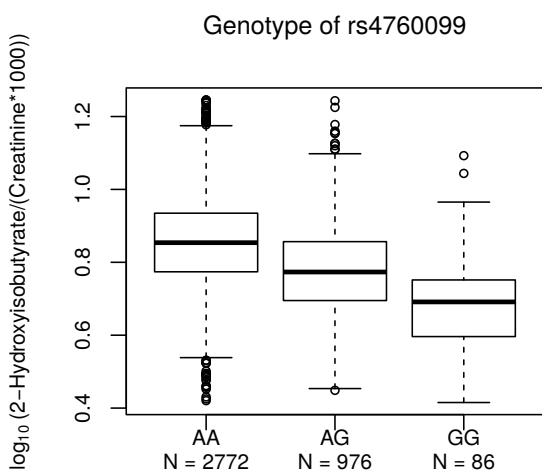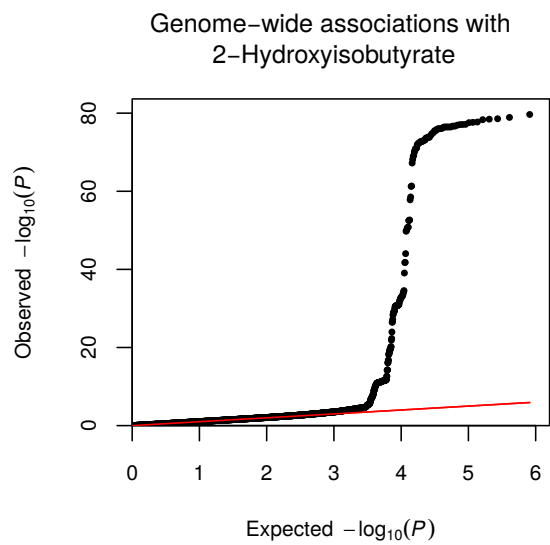

# GWAS with **targeted** metabolic traits - PNMT locus

## Associations with Histidine/tau-Methylhistidine

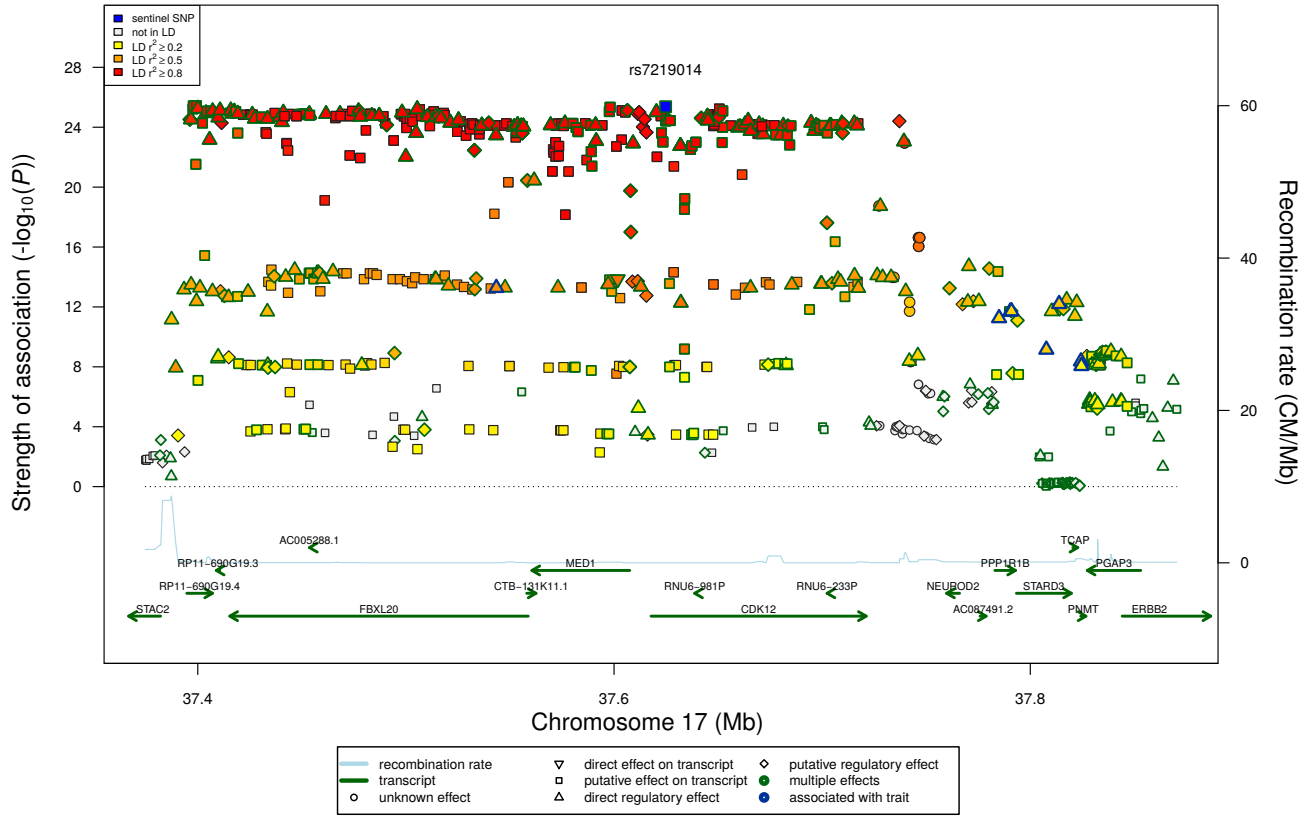

Genotype of rs7219014

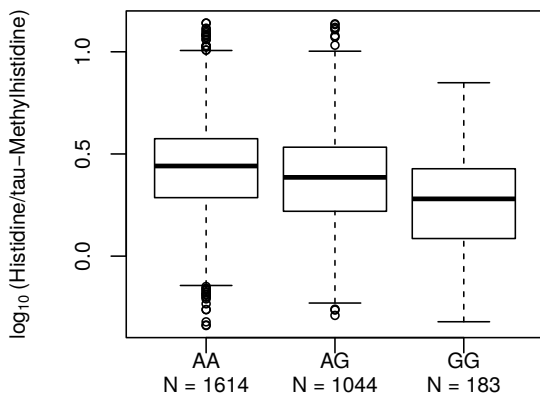

Genome-wide associations with Histidine/tau-Methylhistidine



# GWAS with **targeted** metabolic traits - **SLC7A9** locus

## Associations with Lysine

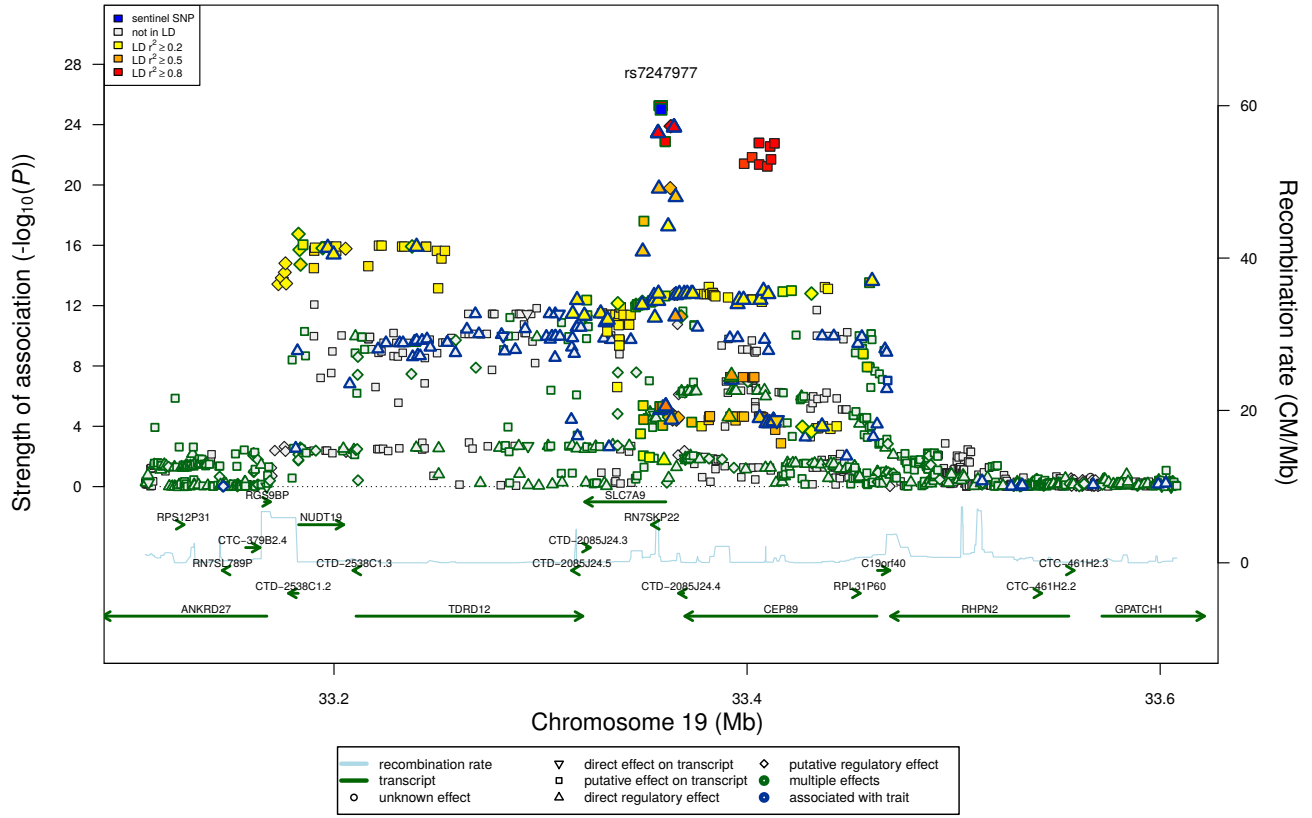

Genotype of rs7247977

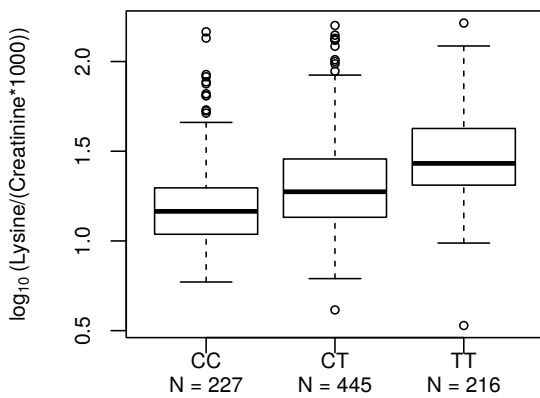

Genome-wide associations with Lysine

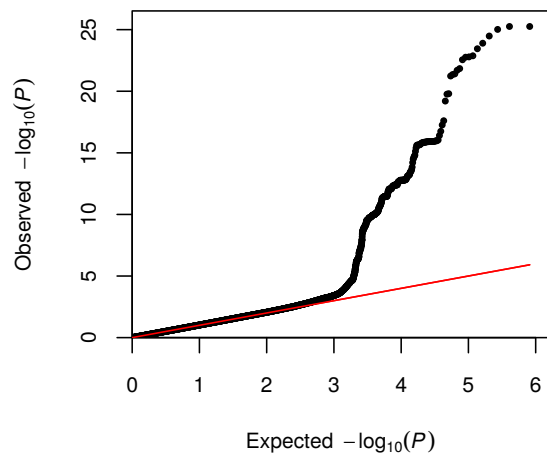

# GWAS with **targeted** metabolic traits - **SLC13A3** locus

## Associations with Succinate/Citrate

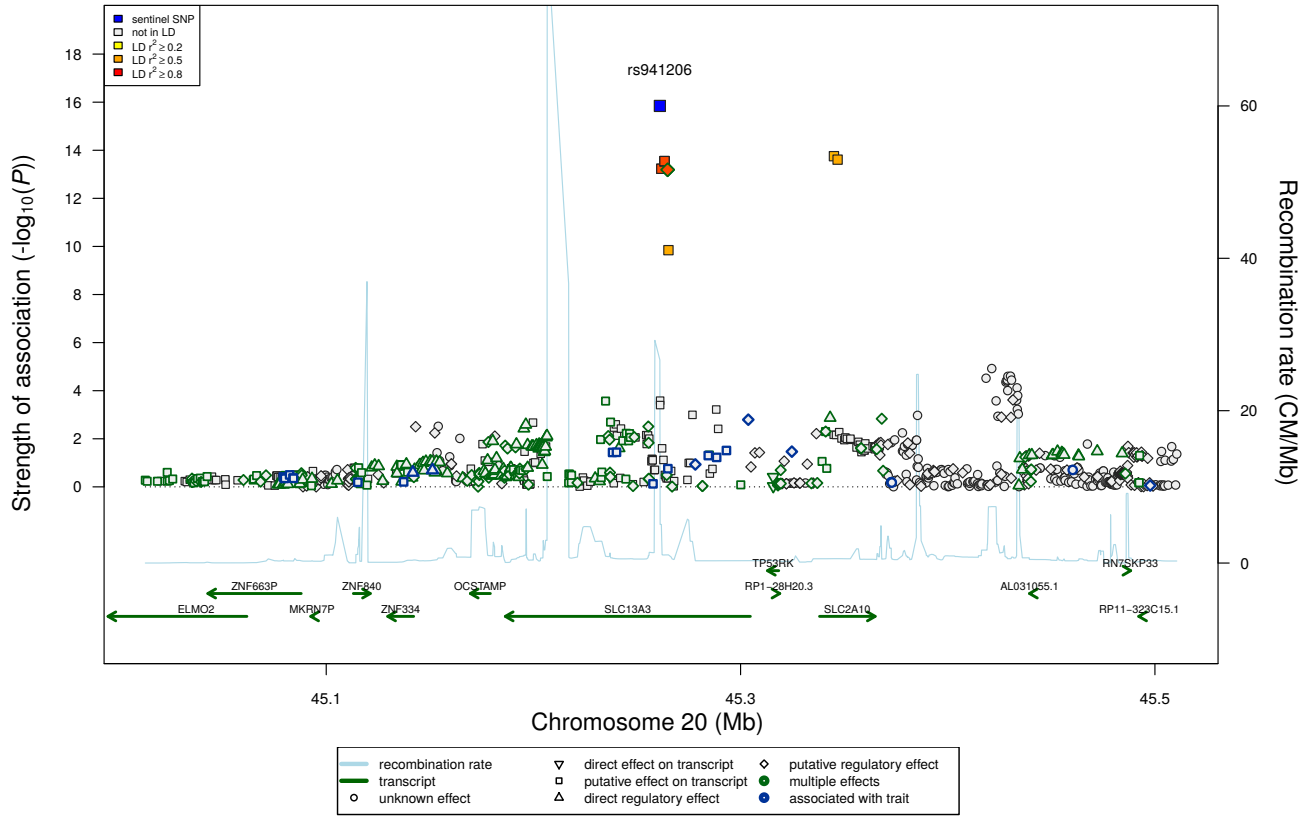

Genotype of rs941206

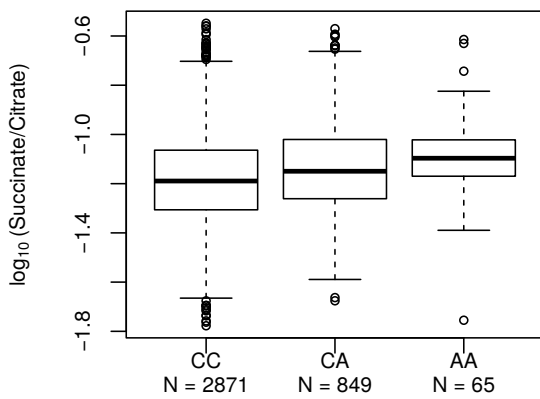

Genome-wide associations with Succinate/Citrate

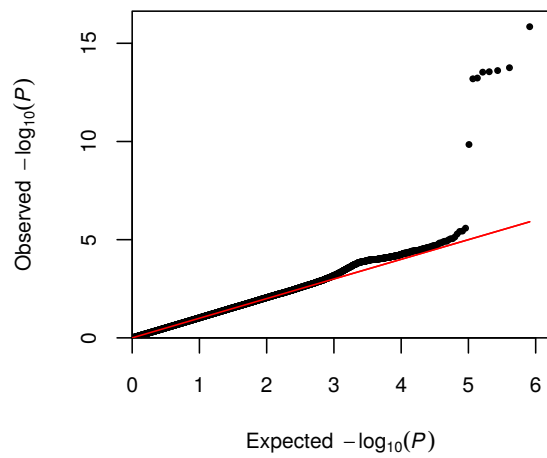

# GWAS with **non-targeted** metabolic traits - **NAT8** locus

Associations with 2.0308 ppm

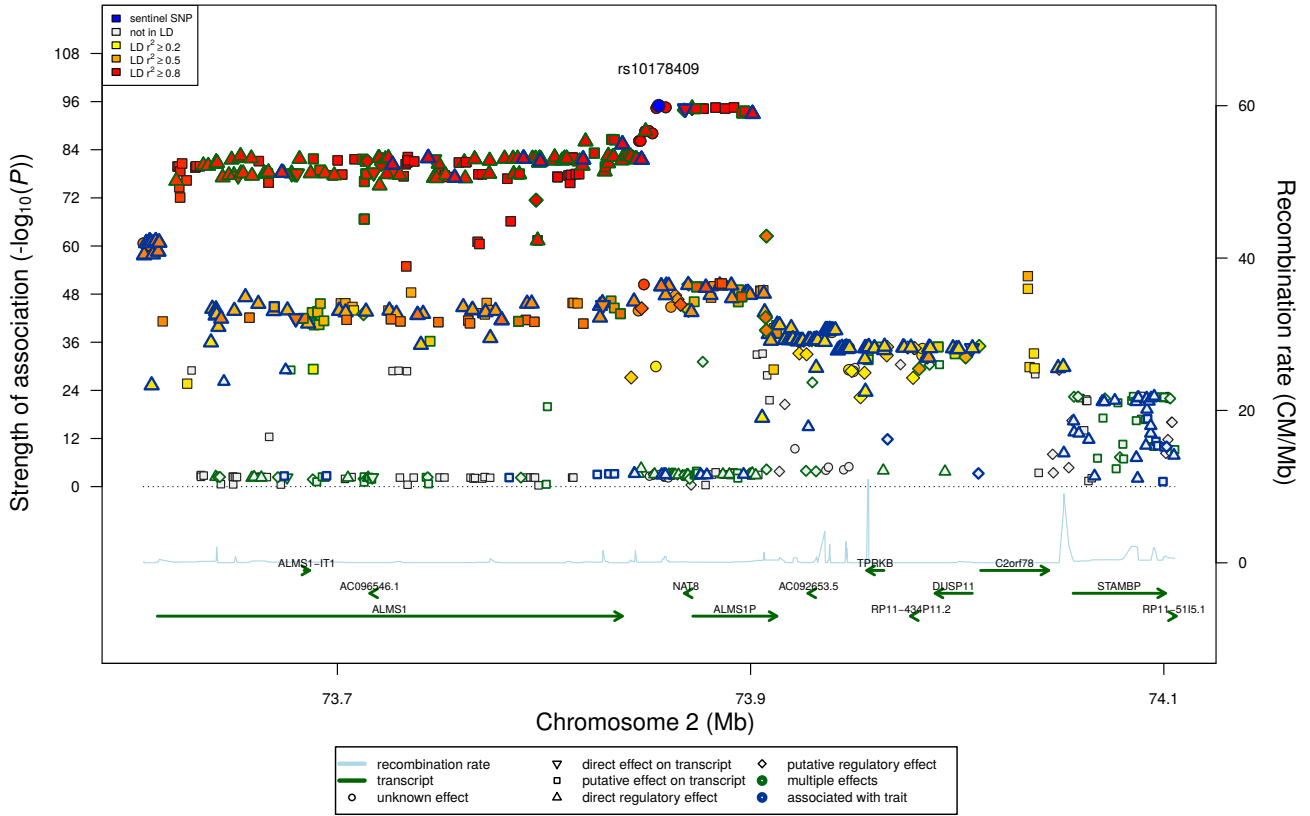

Genotype of rs10178409

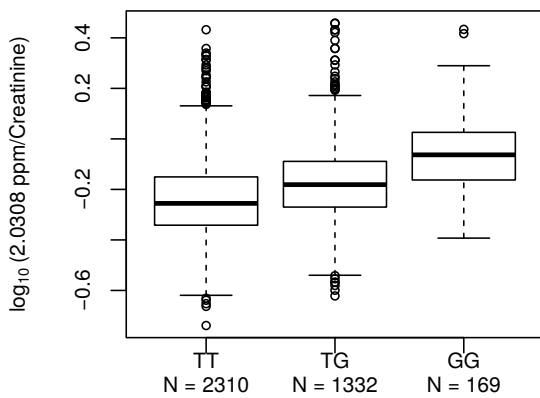

Genome-wide associations with 2.0308 ppm

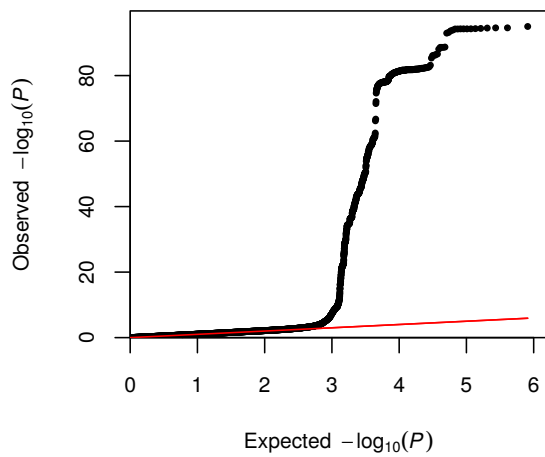



# GWAS with **non-targeted** metabolic traits - **HIBCH** locus

Associations with 1.0666/1.0489 ppm

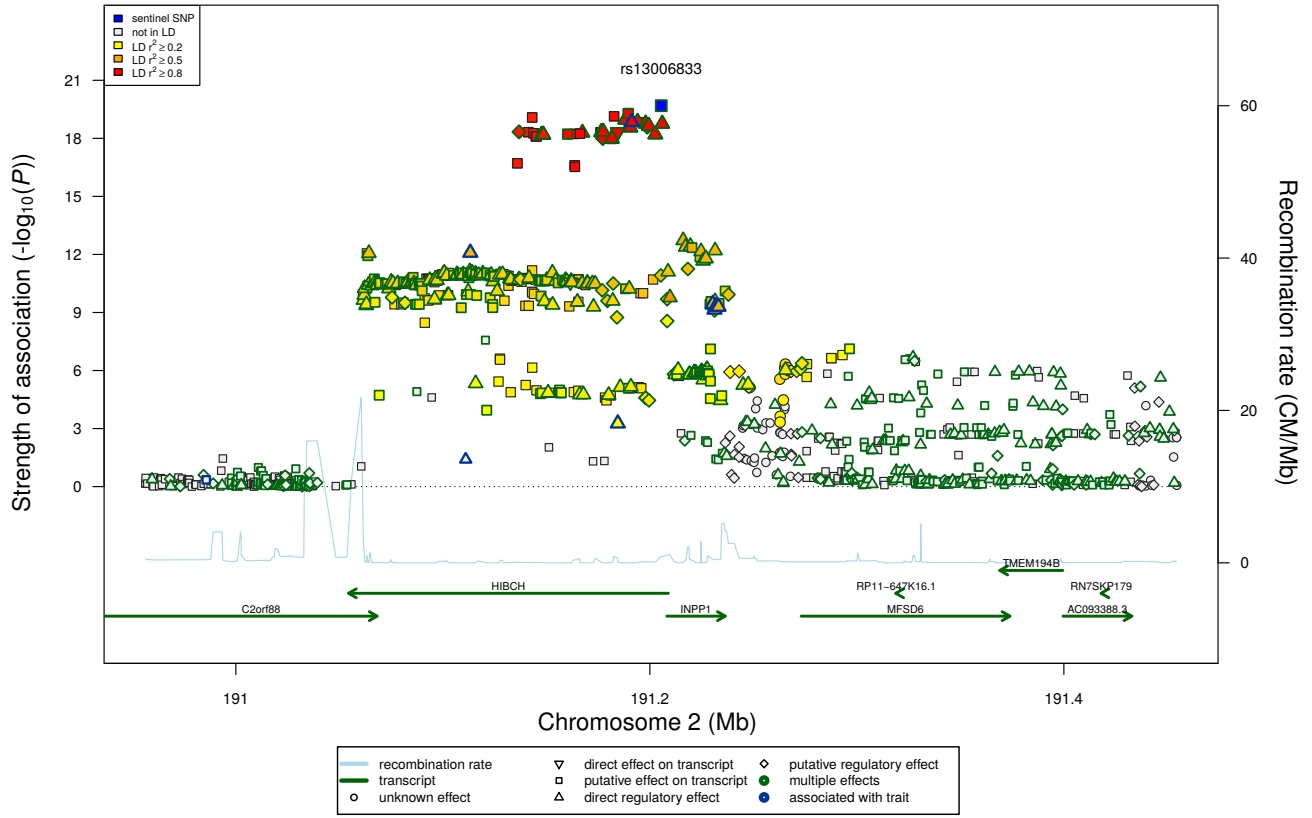

Genotype of rs13006833

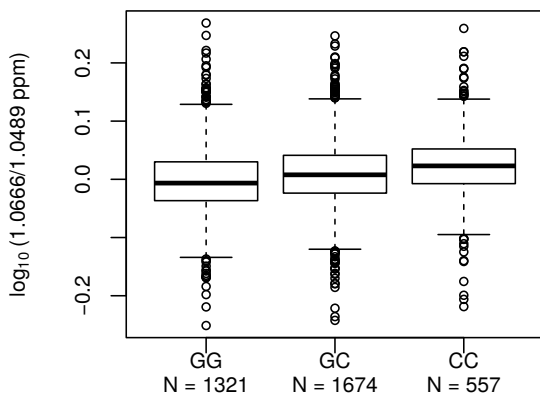

Genome-wide associations with 1.0666/1.0489 ppm

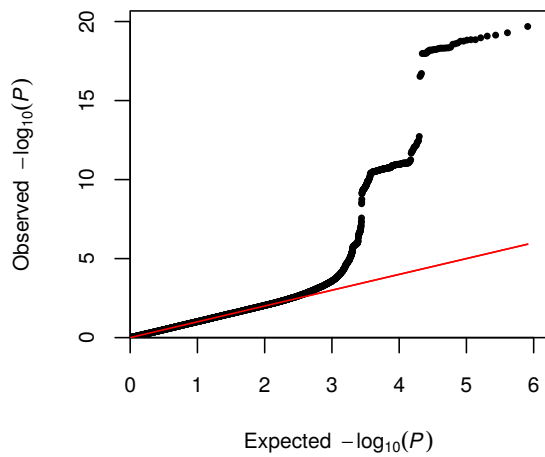

# GWAS with **non-targeted** metabolic traits - **CPS1** locus

Associations with 3.5549/2.5468 ppm

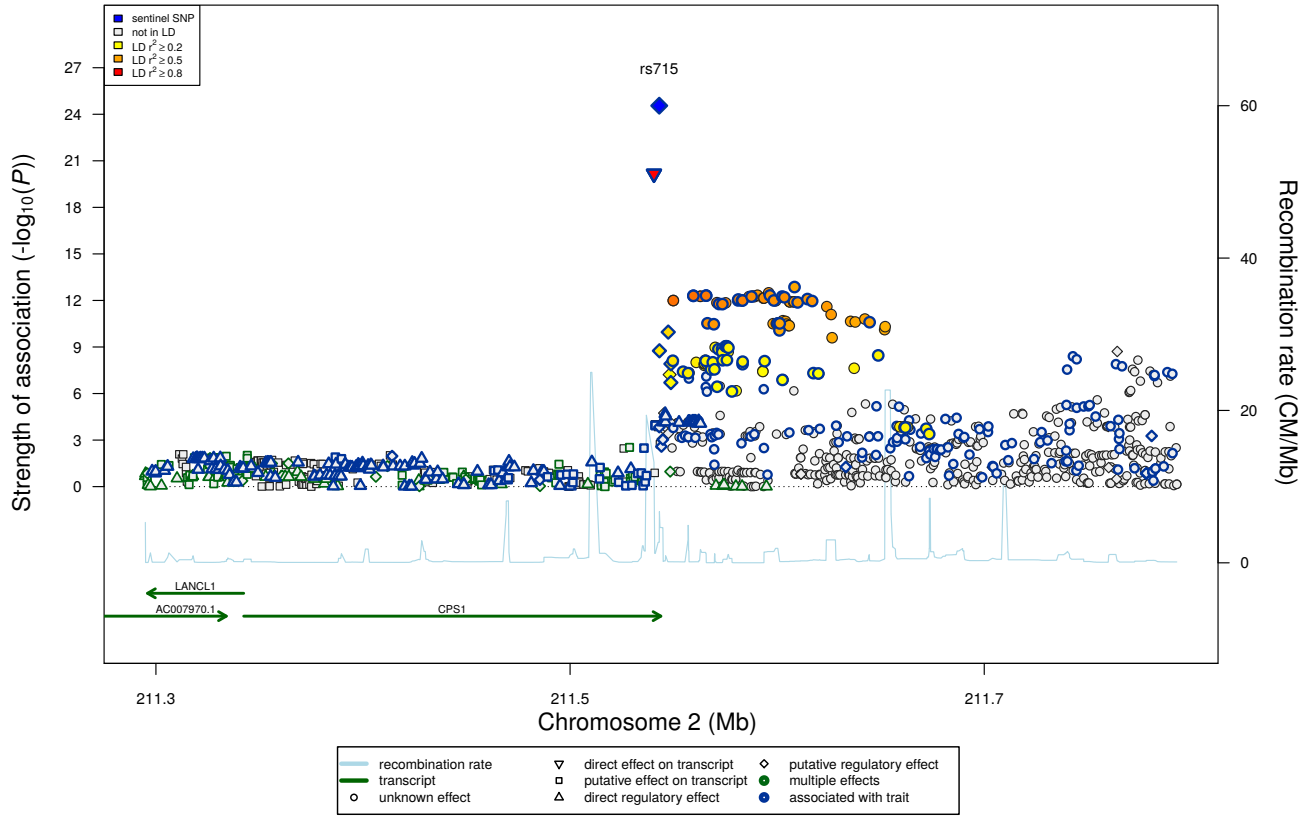

Genotype of rs715

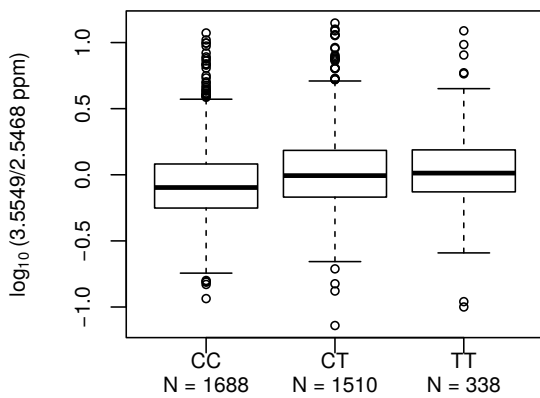

Genome-wide associations with 3.5549/2.5468 ppm

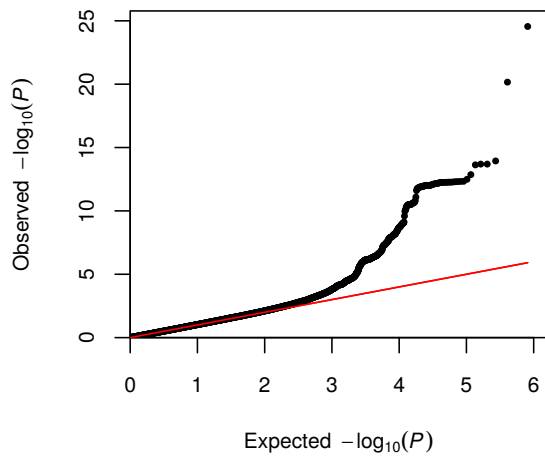

# GWAS with non-targeted metabolic traits - AGXT locus

Associations with 1.0857 ppm

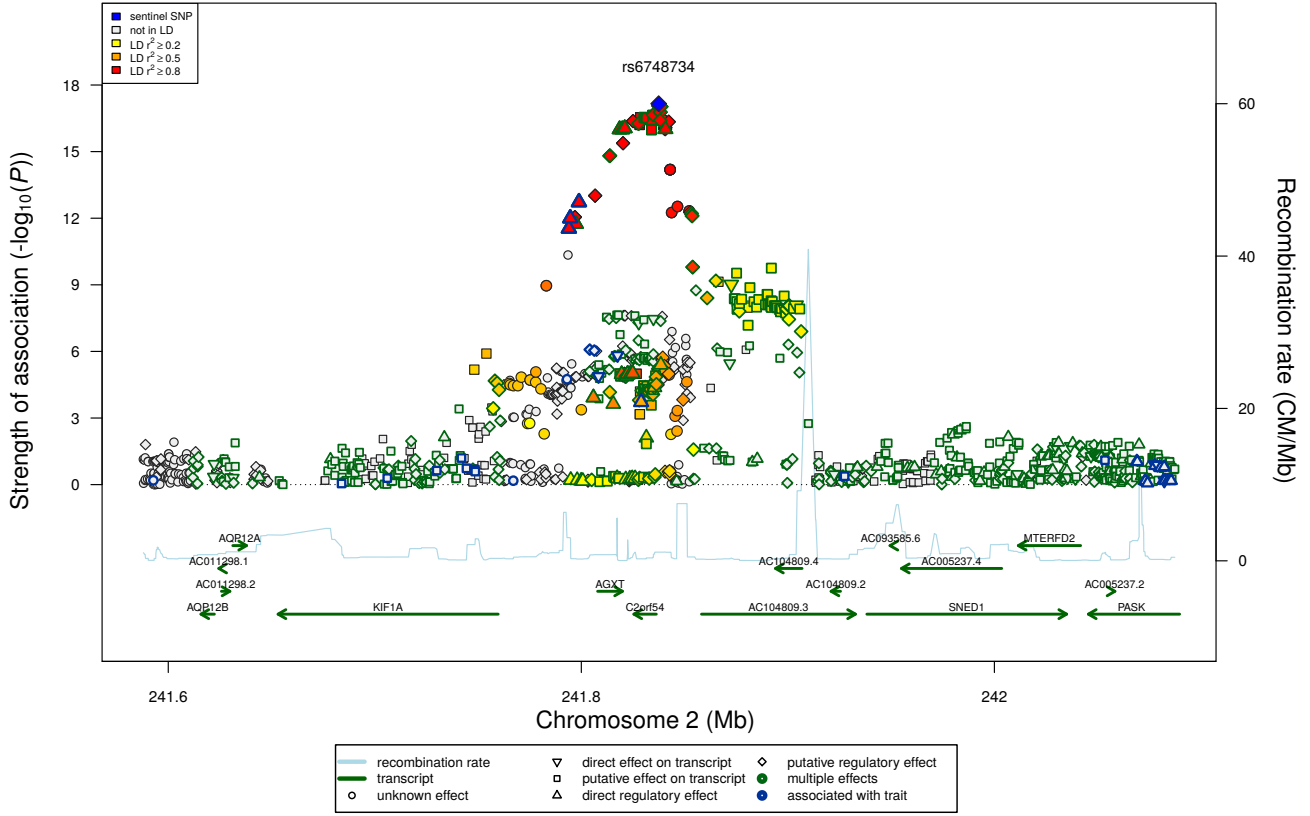

Genotype of rs6748734

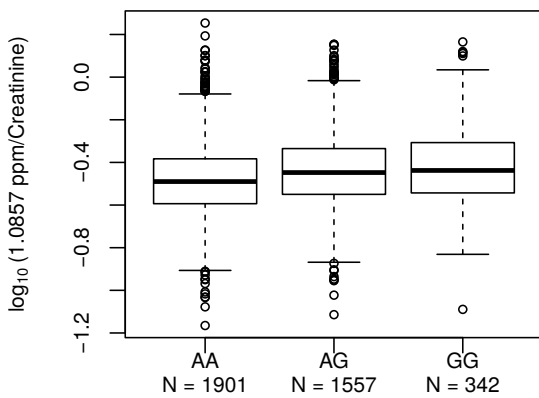

Genome-wide associations with 1.0857 ppm

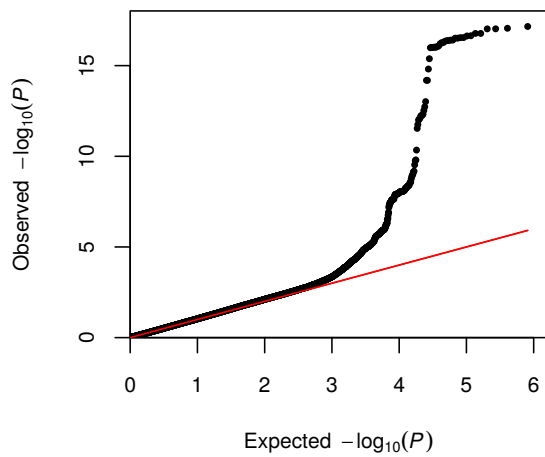

# GWAS with **non-targeted** metabolic traits - **SLC6A20** locus

Associations with 2.9156 ppm

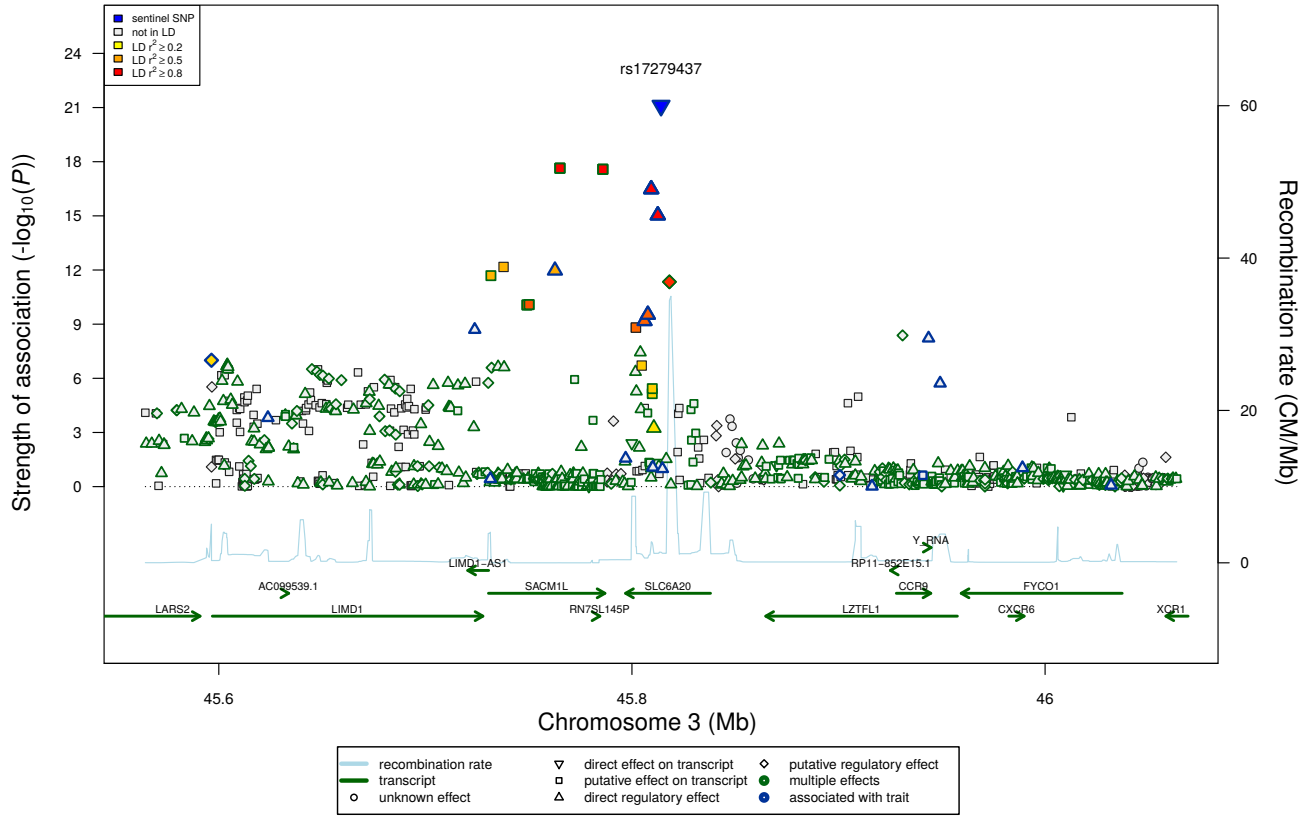

Genotype of rs17279437

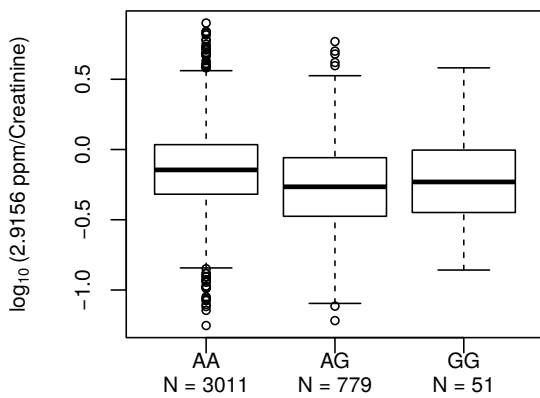

Genome-wide associations with 2.9156 ppm

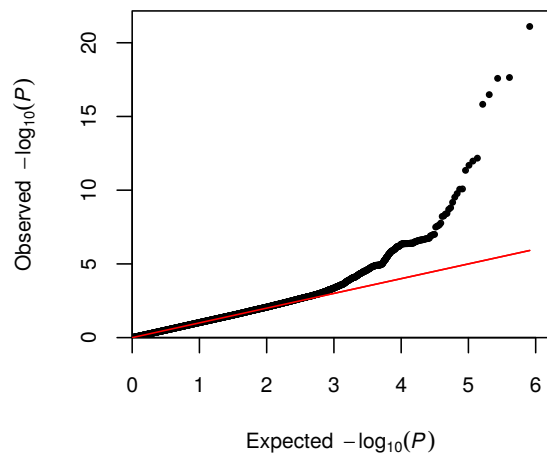

# GWAS with **non-targeted** metabolic traits - **TKT** locus

Associations with 4.0935/7.6643 ppm

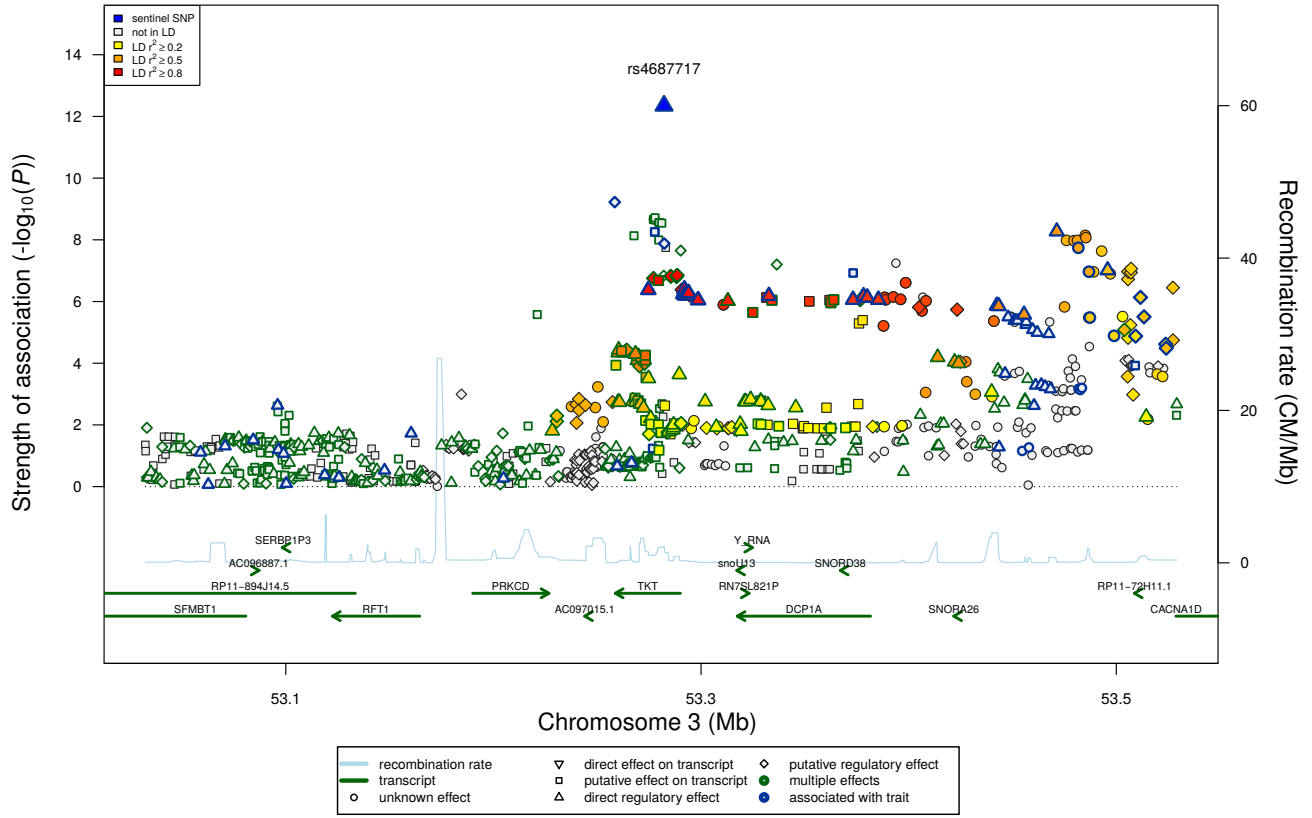

Genotype of rs4687717

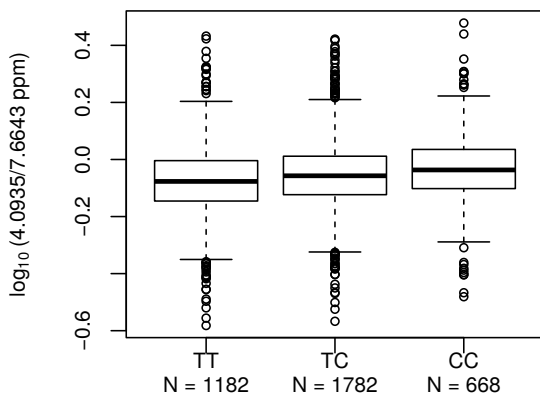

Genome-wide associations with 4.0935/7.6643 ppm

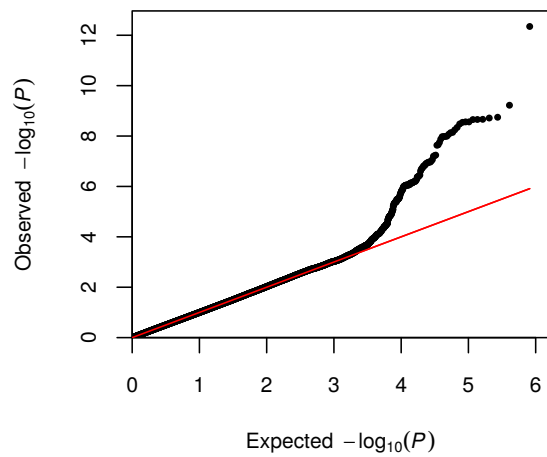

# GWAS with **non-targeted** metabolic traits - **ETNPPL** locus

Associations with 3.1263 ppm

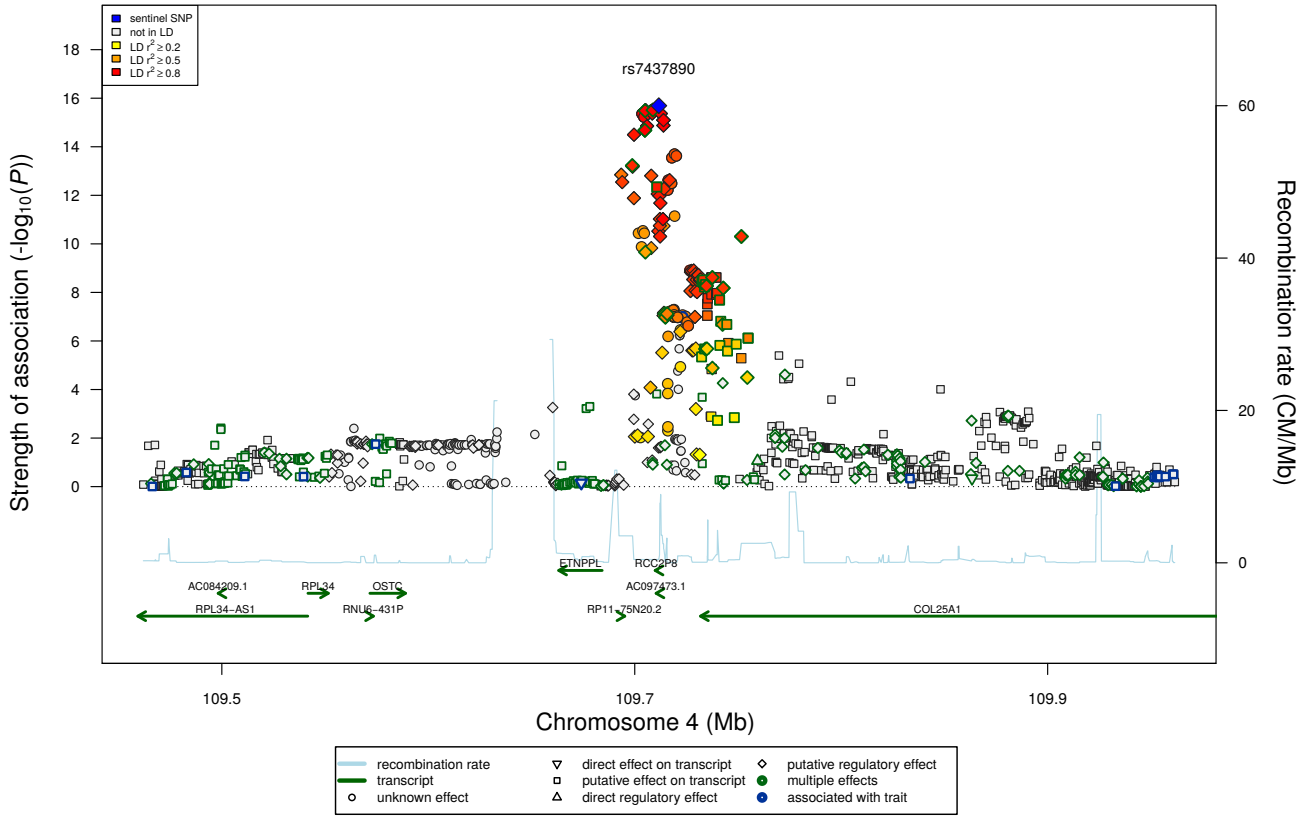

Genotype of rs7437890

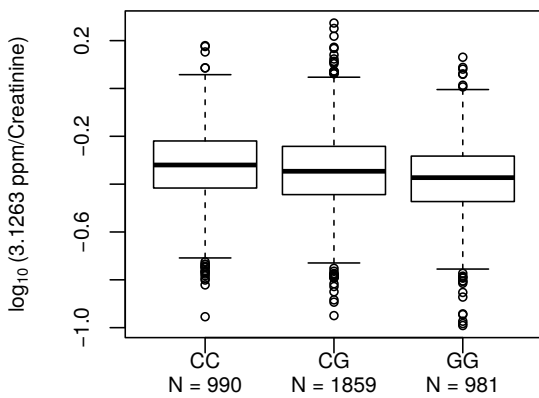

Genome-wide associations with 3.1263 ppm

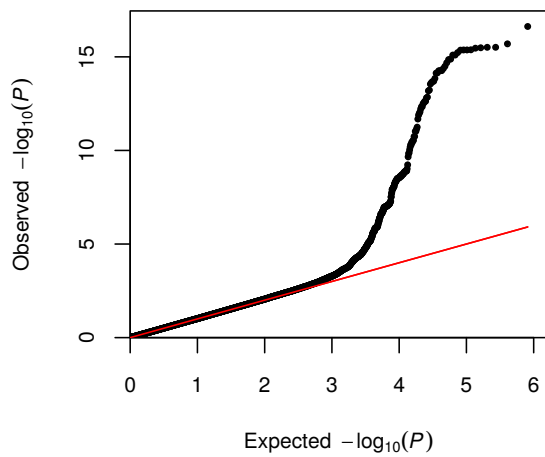

# GWAS with **non-targeted** metabolic traits - **SLC6A19** locus

Associations with 6.8769 ppm

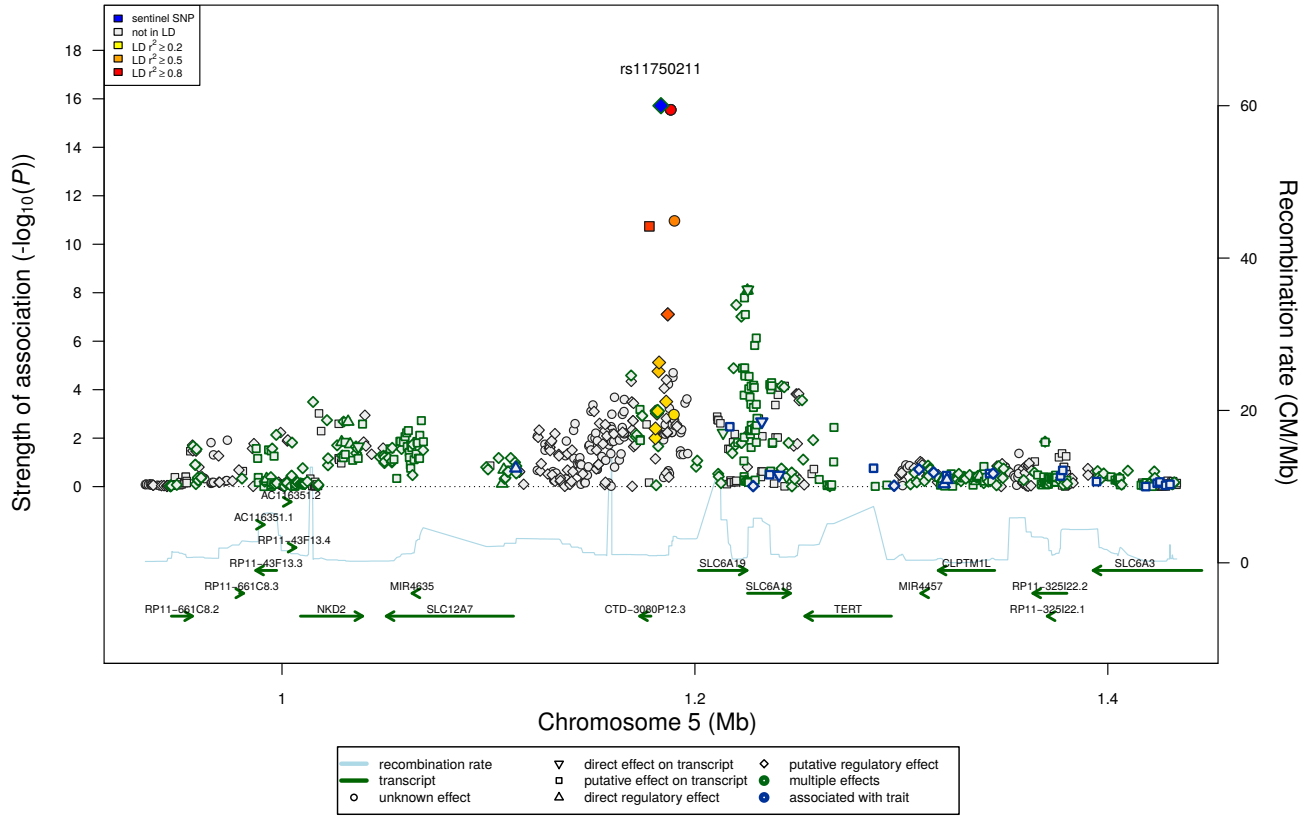

Genotype of rs11750211

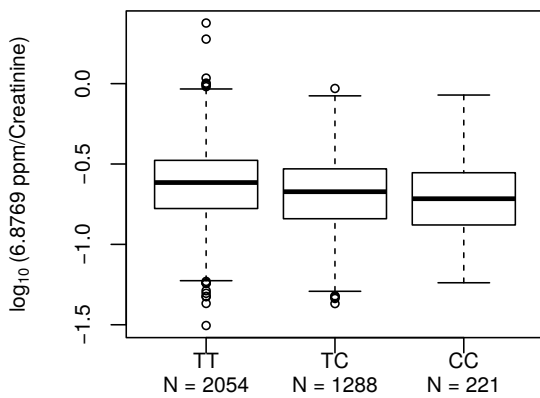

Genome-wide associations with 6.8769 ppm

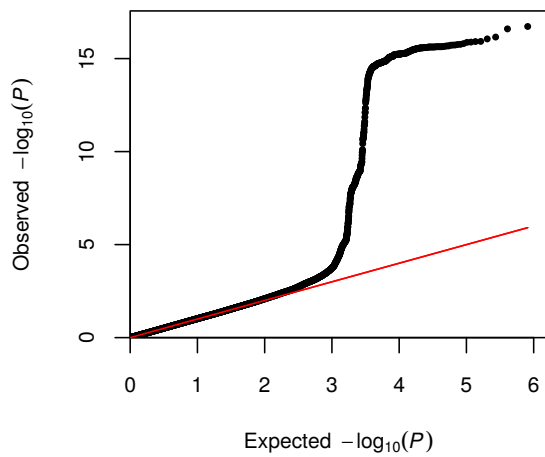

# GWAS with **non-targeted** metabolic traits - **AGXT2** locus

Associations with 1.1710/1.9733 ppm

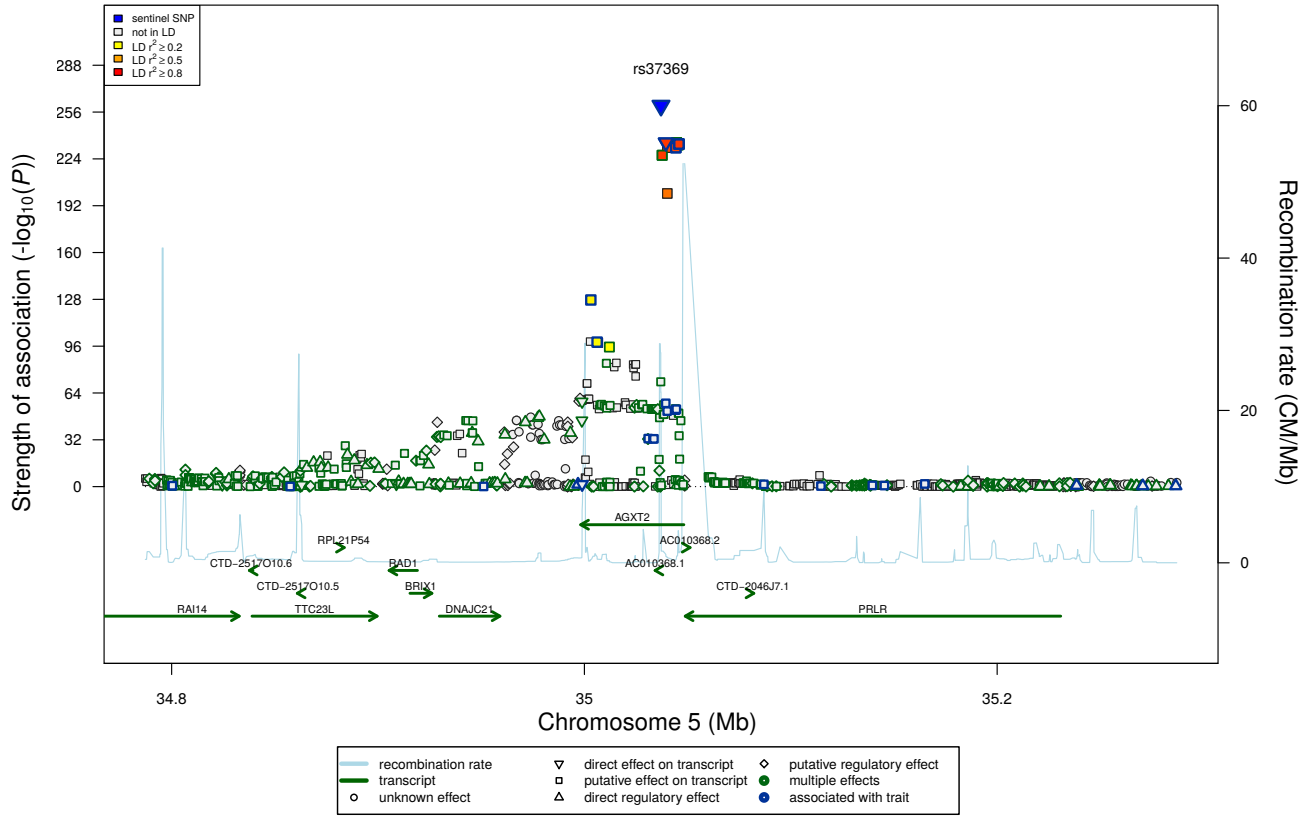

Genotype of rs37369

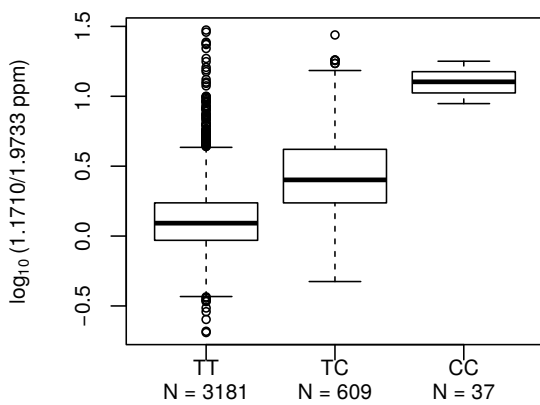

Genome-wide associations with 1.1710/1.9733 ppm

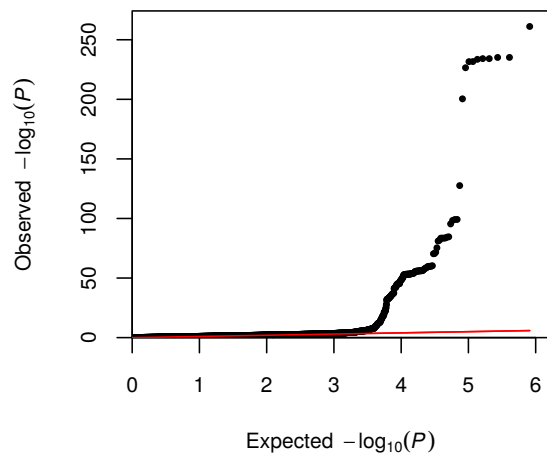



# GWAS with **non-targeted** metabolic traits - **DMGDH** locus

Associations with 2.9156/5.2355 ppm

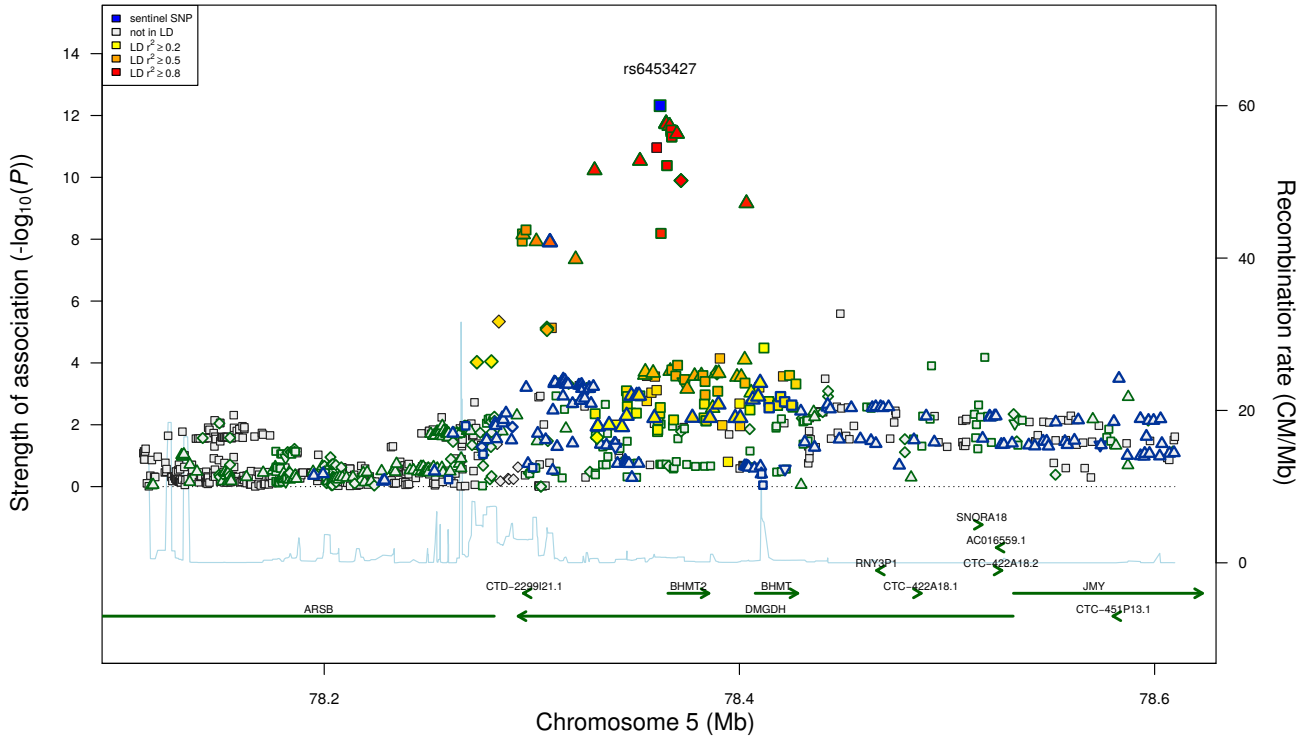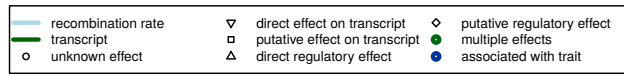

Genotype of rs6453427

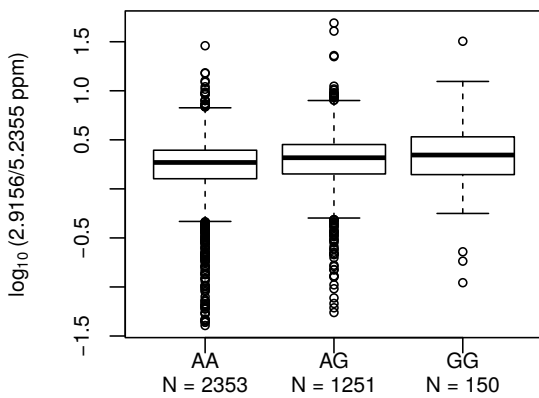

Genome-wide associations with 2.9156/5.2355 ppm

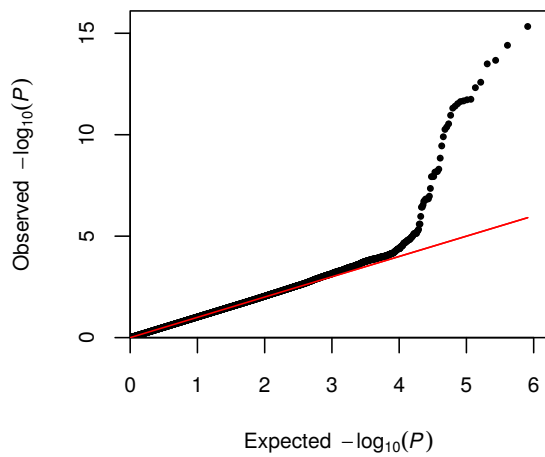

# GWAS with **non-targeted** metabolic traits - **SLC36A2** locus

Associations with 3.5549/2.6495 ppm

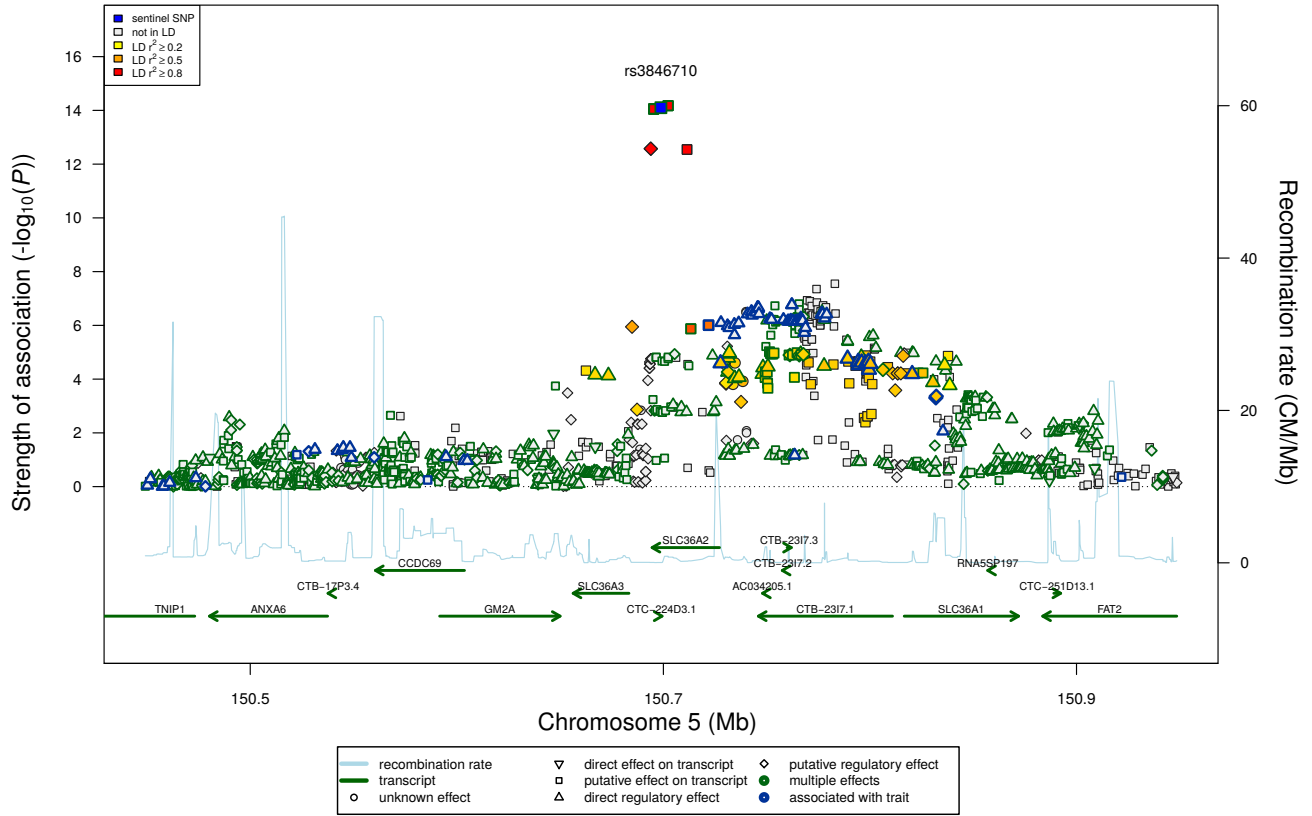

Genotype of rs3846710

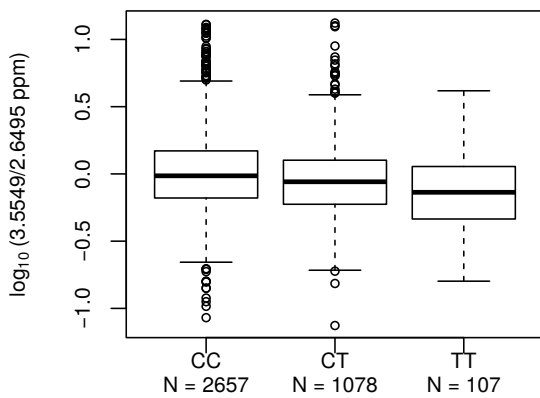

Genome-wide associations with 3.5549/2.6495 ppm

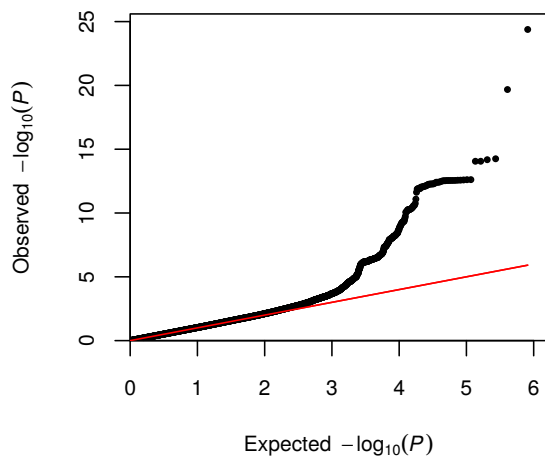

# GWAS with **non-targeted** metabolic traits - **NAT2** locus

Associations with 2.1586/3.3240 ppm

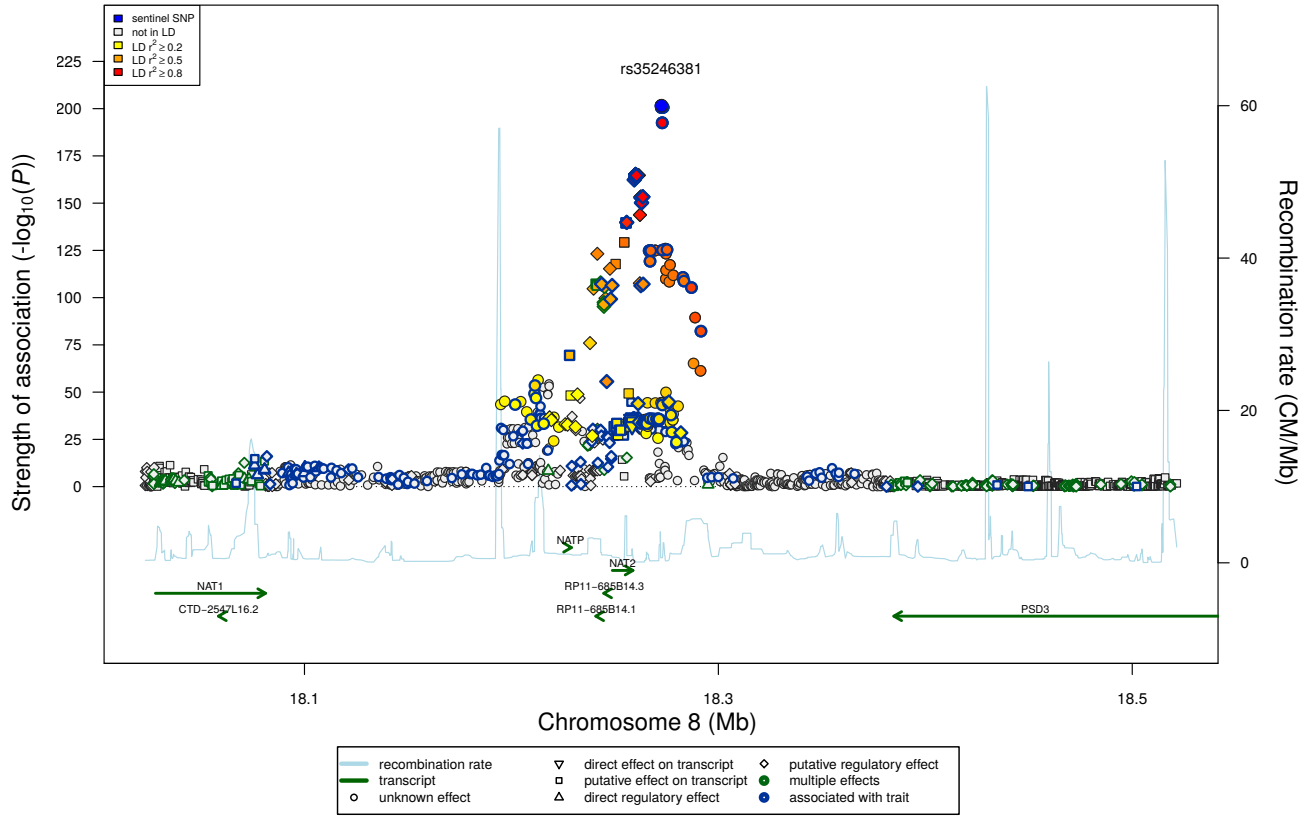

Genotype of rs35246381

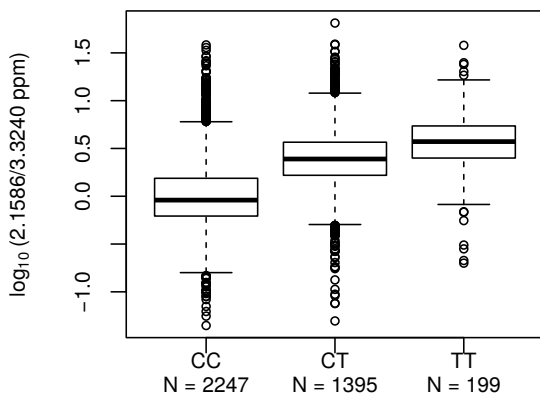

Genome-wide associations with 2.1586/3.3240 ppm

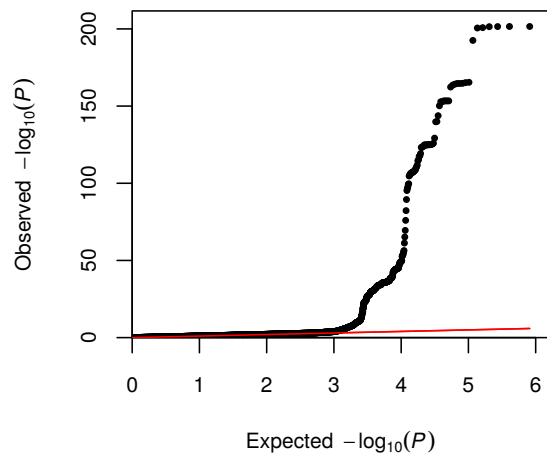

# GWAS with **non-targeted** metabolic traits - **ABO** locus

Associations with 2.0308/2.0489 ppm

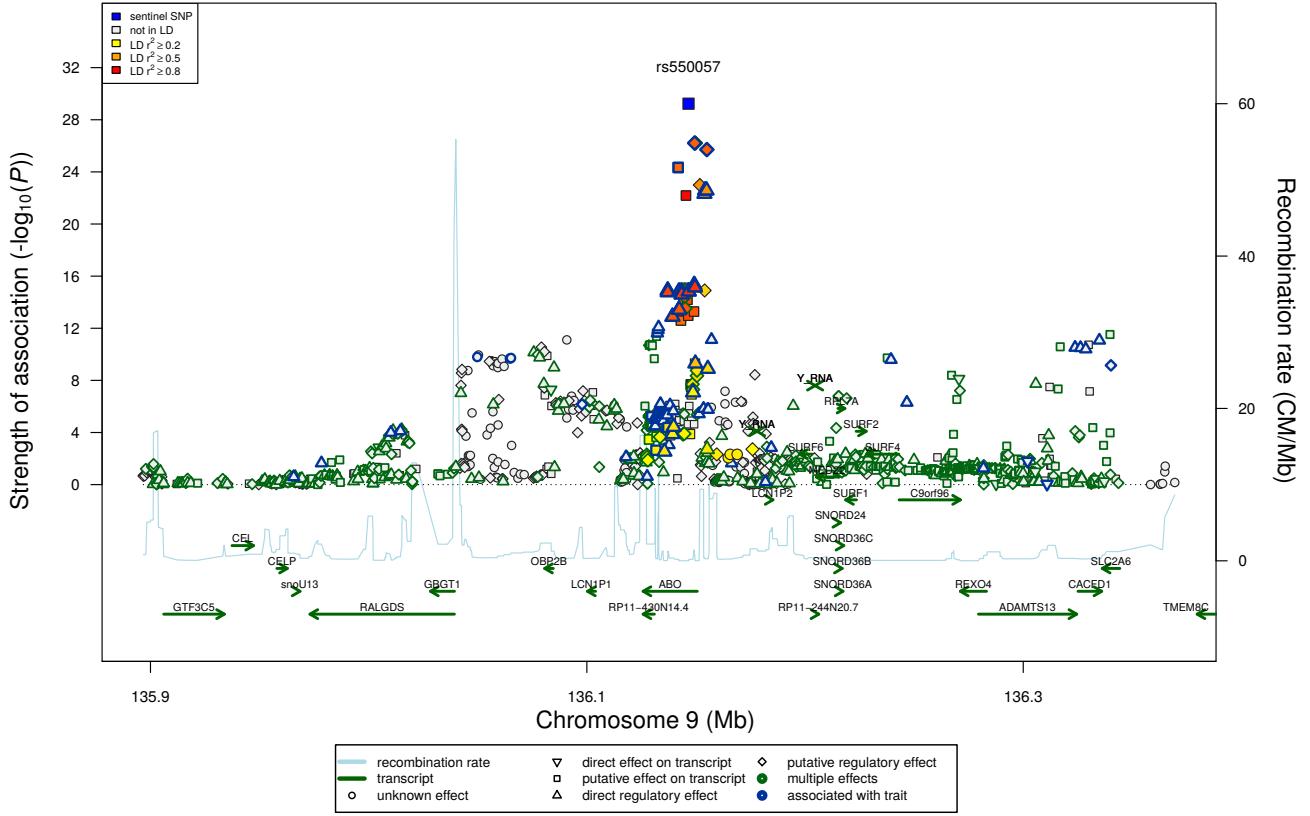

Genotype of rs550057

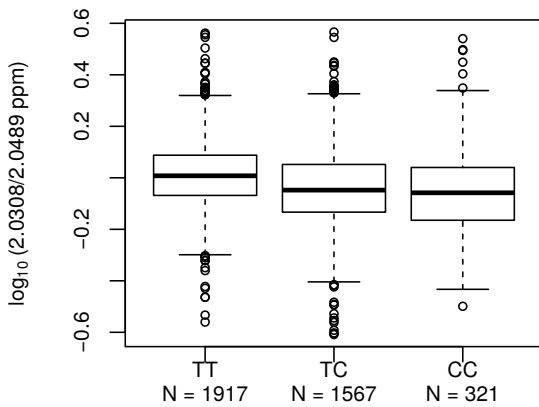

Genome-wide associations with 2.0308/2.0489 ppm

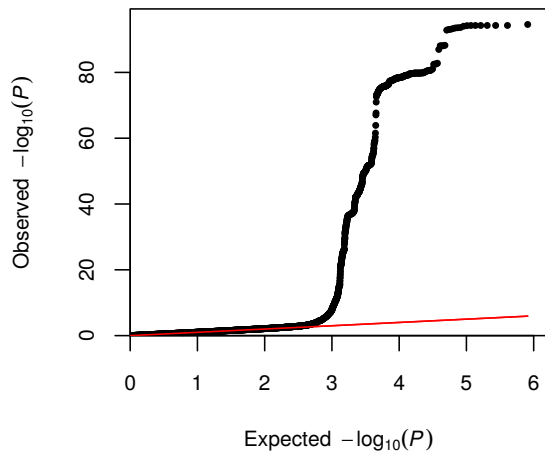

# GWAS with non-targeted metabolic traits - PYROXD2 locus

Associations with 2.8541 ppm

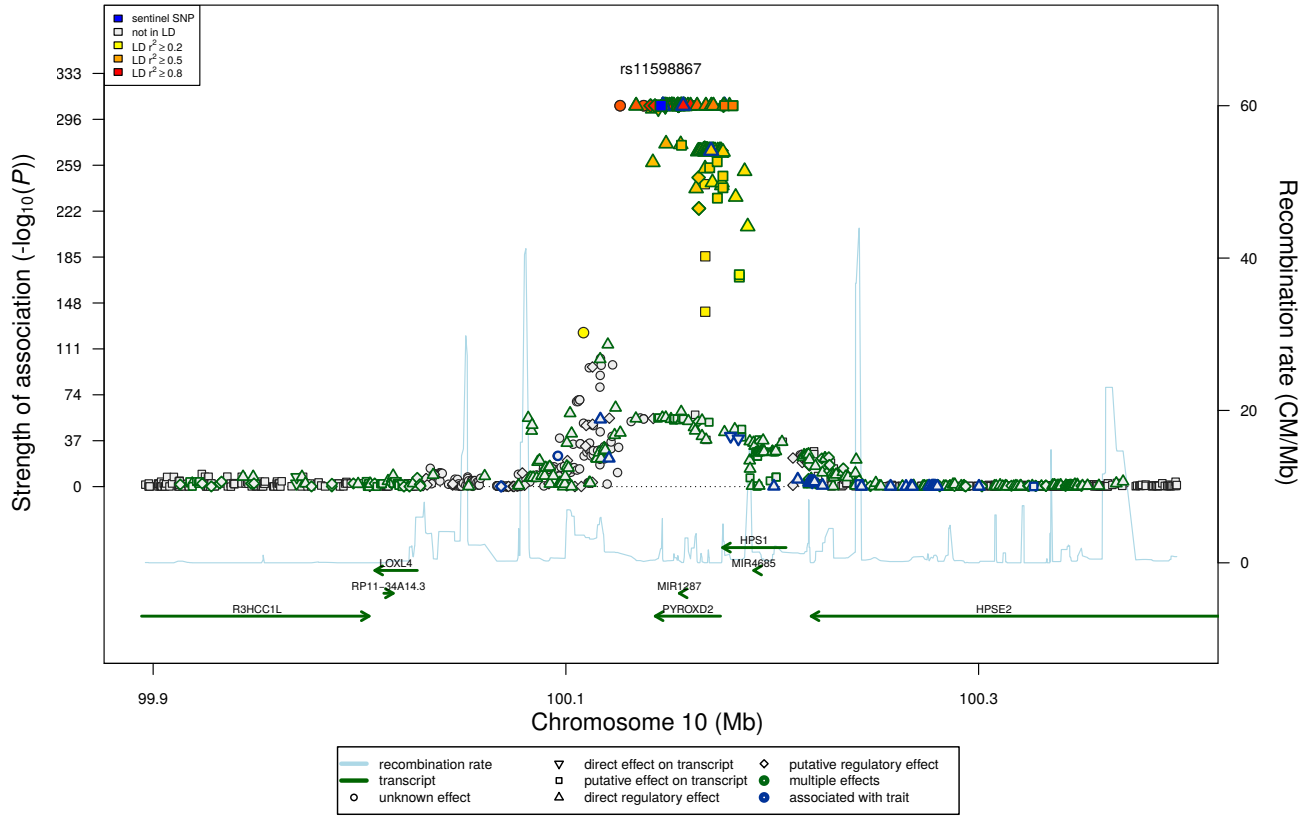

Genotype of rs11598867

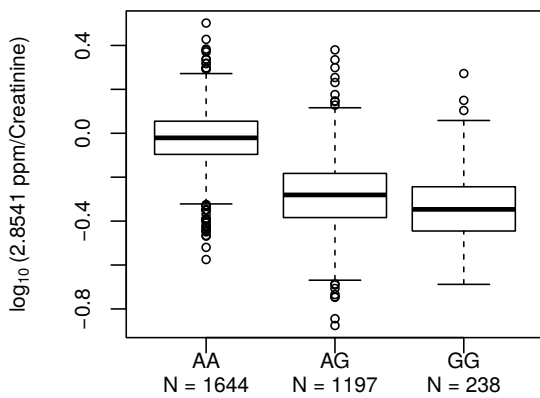

Genome-wide associations with 2.8541 ppm

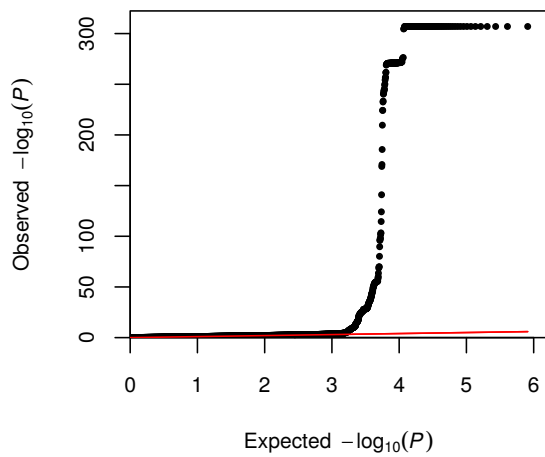

# GWAS with **non-targeted** metabolic traits - **SLC6A13** locus

Associations with 1.1895 ppm

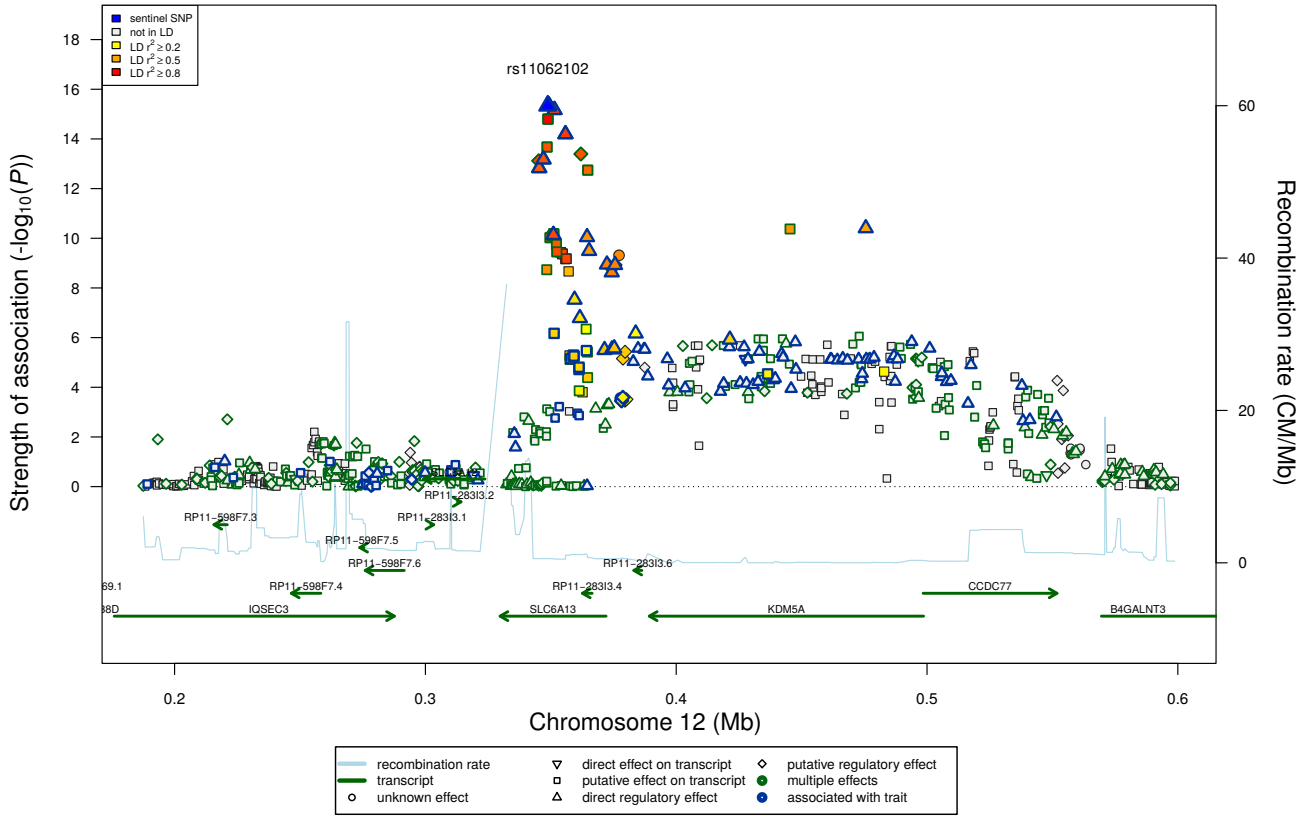

Genotype of rs11062102

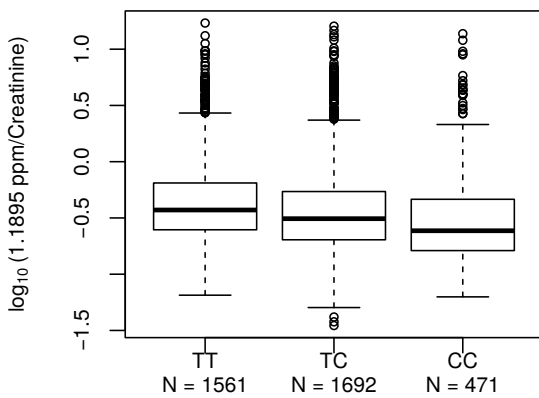

Genome-wide associations with 1.1895 ppm

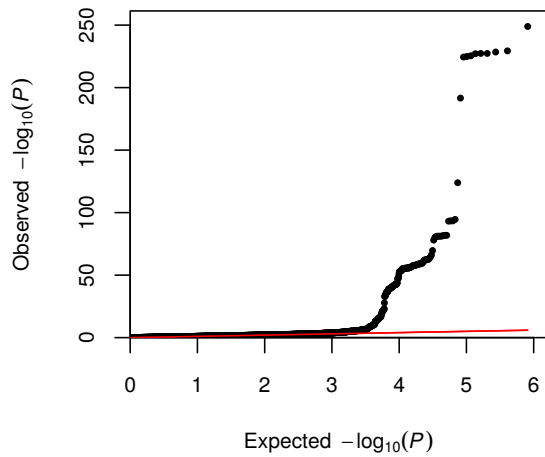

# GWAS with **non-targeted** metabolic traits - **HPD** locus

Associations with 1.3455/7.6643 ppm

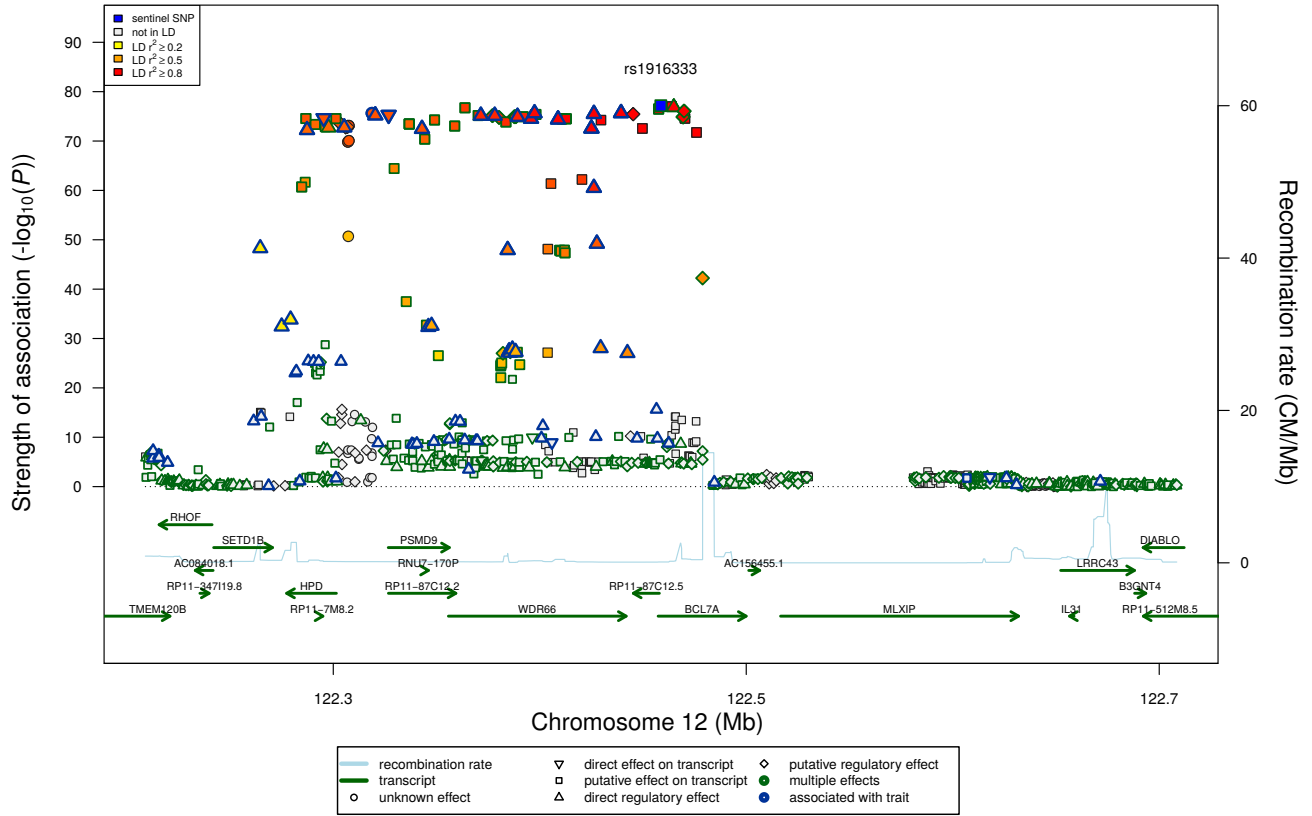

Genotype of rs1916333

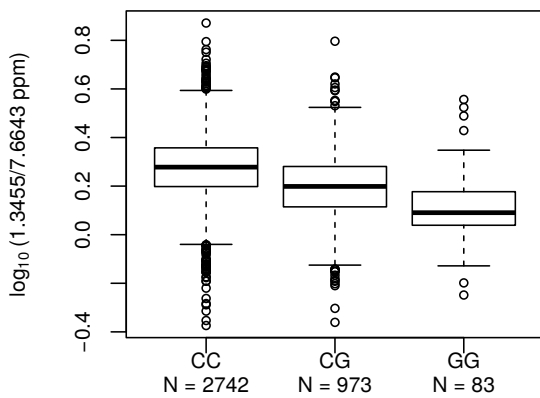

Genome-wide associations with 1.3455/7.6643 ppm

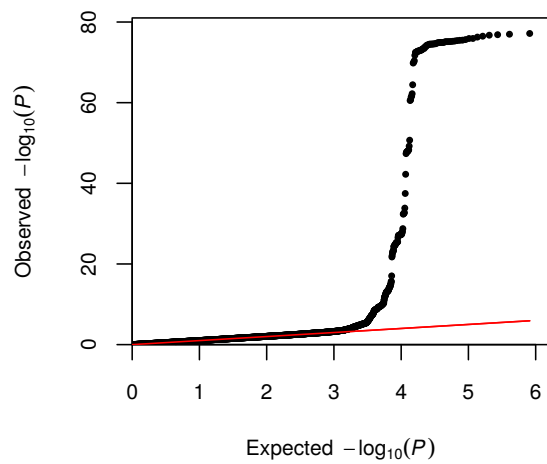

# GWAS with **non-targeted** metabolic traits - **ACSM3** locus

Associations with 1.2565/1.0666 ppm

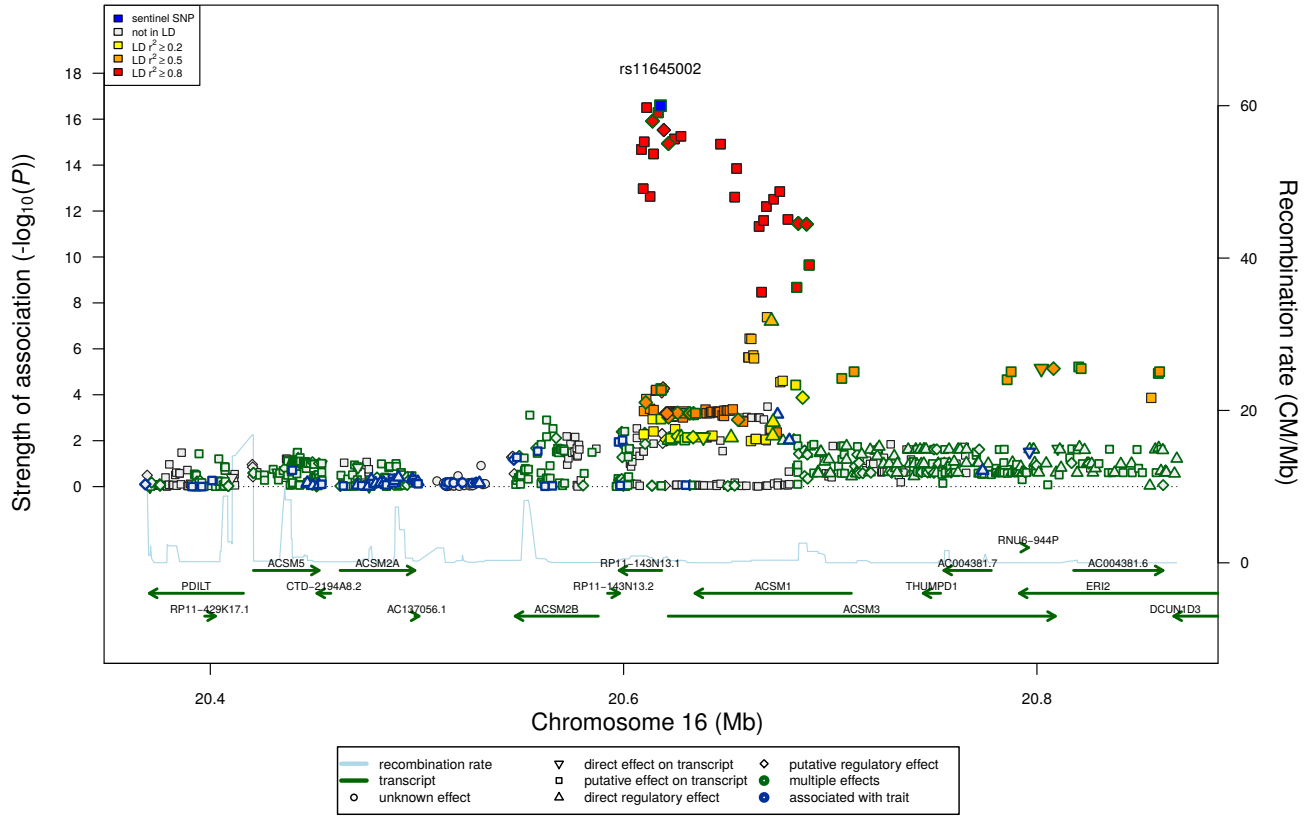

Genotype of rs11645002

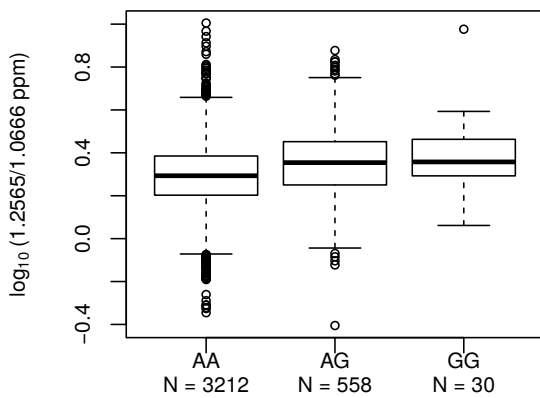

Genome-wide associations with 1.2565/1.0666 ppm

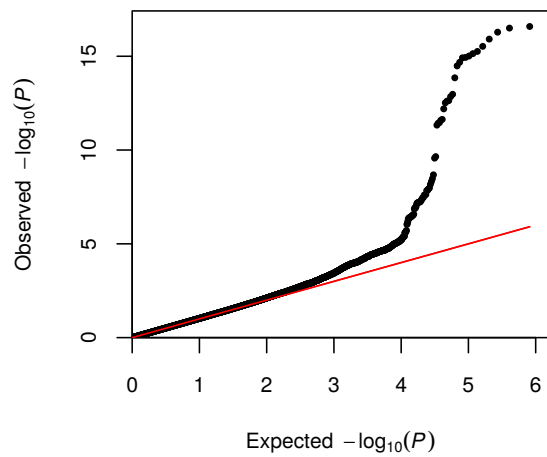



# GWAS with **non-targeted** metabolic traits - **SLC5A11** locus

Associations with 3.5944/1.0666 ppm

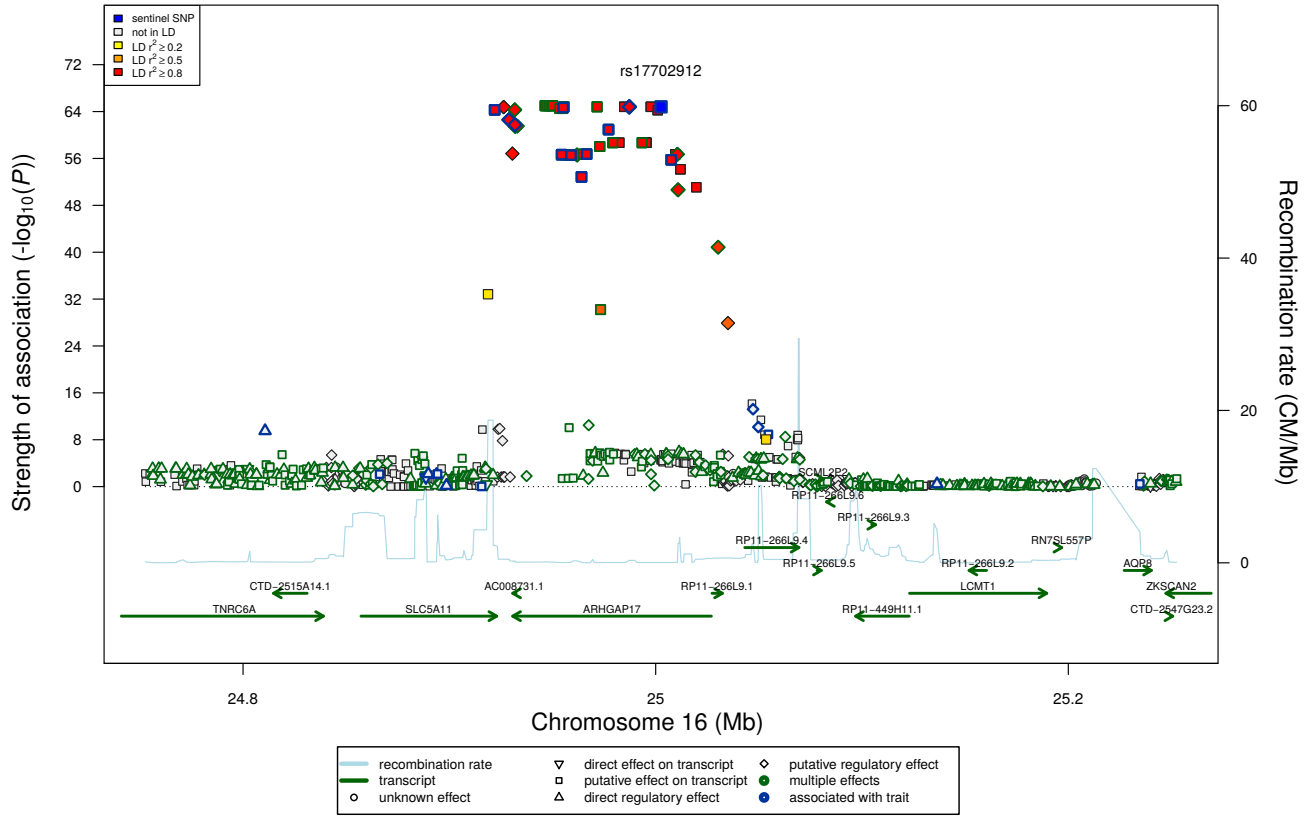

Genotype of rs17702912

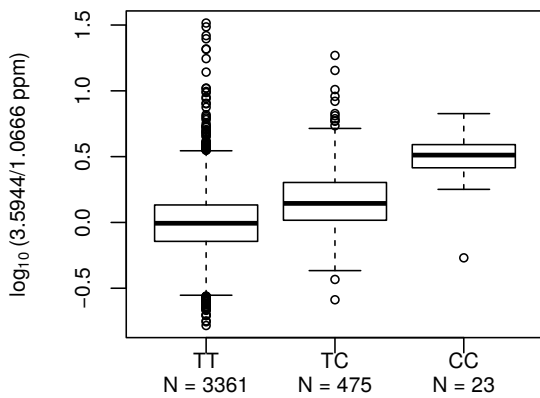

Genome-wide associations with 3.5944/1.0666 ppm

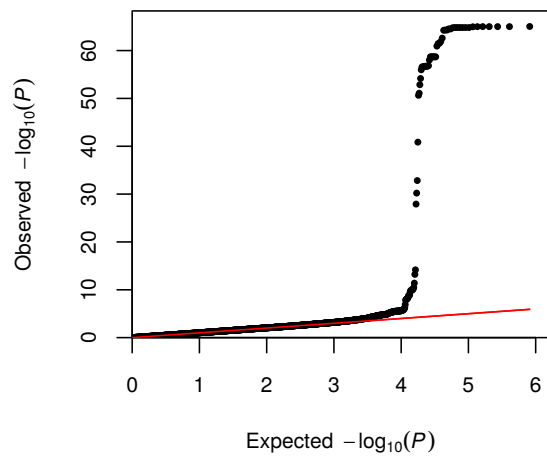

# GWAS with non-targeted metabolic traits - PNMT locus

Associations with 6.8769 ppm

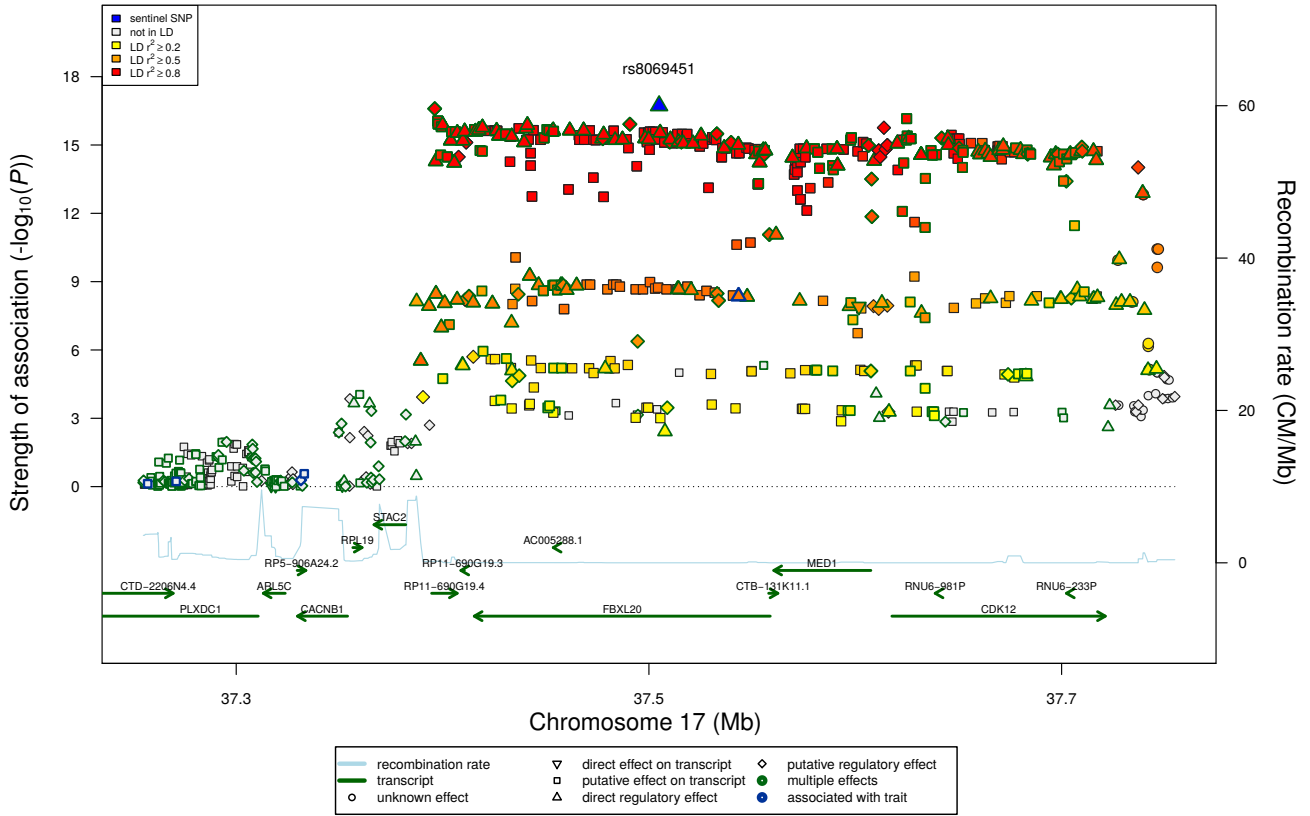

Genotype of rs8069451

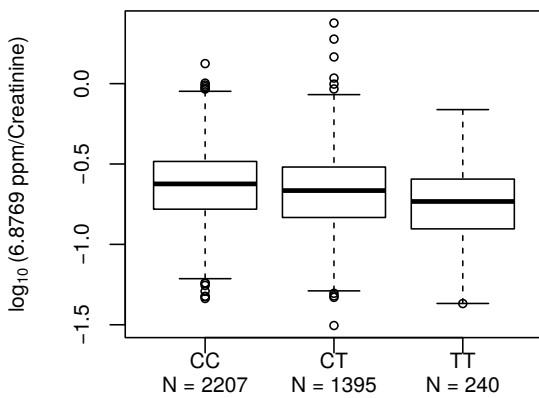

Genome-wide associations with 6.8769 ppm



# GWAS with **non-targeted** metabolic traits - **SLC13A3** locus

Associations with 2.3946/2.6495 ppm

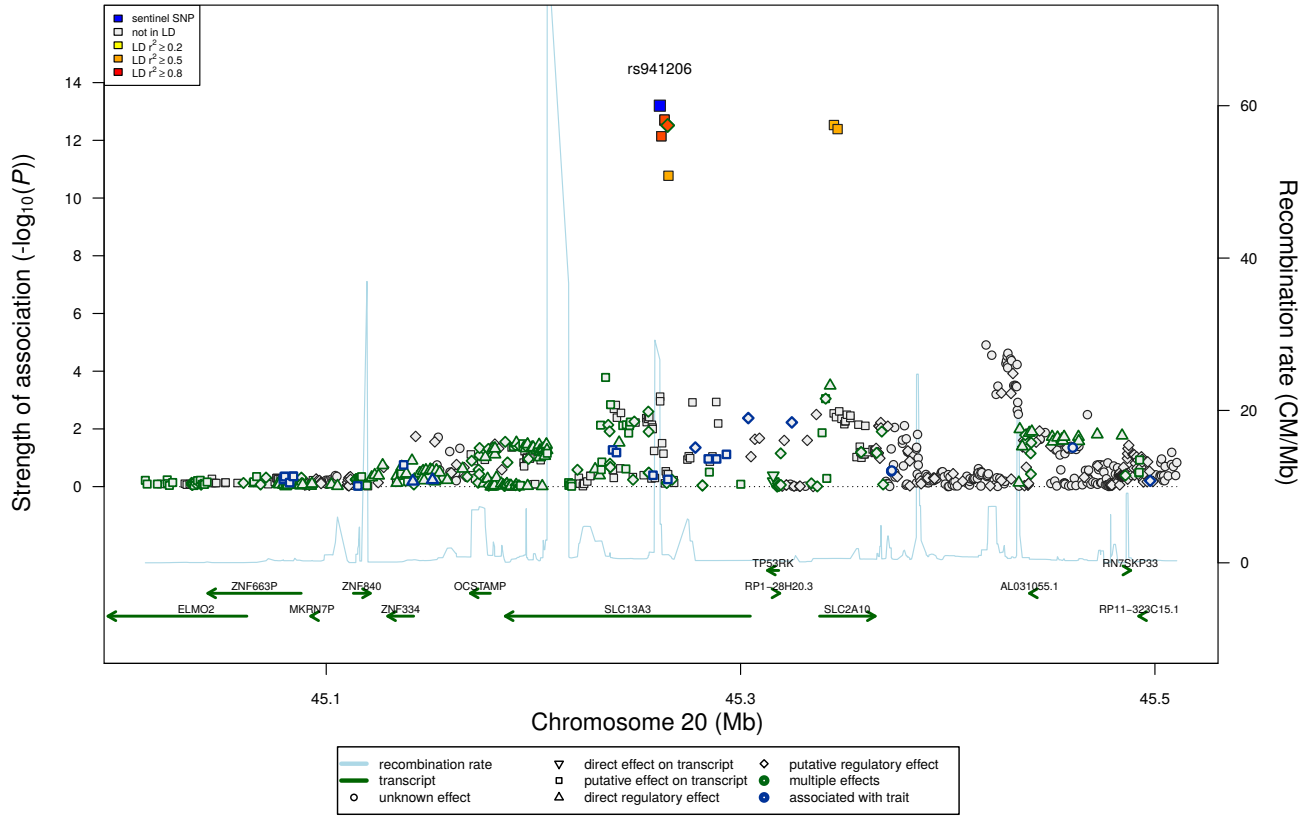

Genotype of rs941206

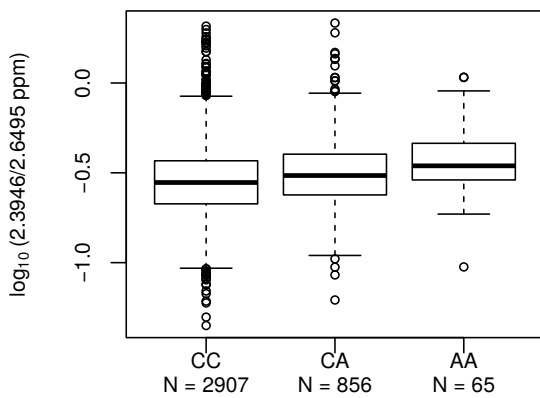

Genome-wide associations with 2.3946/2.6495 ppm

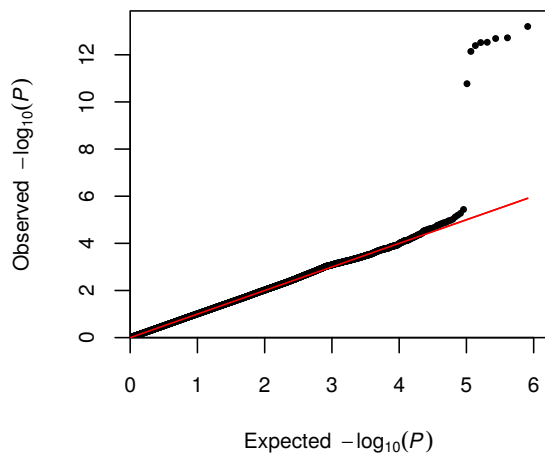

Supplement: pgen.1005487.s002.pdf [file pgen.1005487.s002.pdf]
