# Supplementary material for: Genome-Wide Association Study with Targeted and Non-targeted NMR Metabolomics Identifies 15 Novel Loci of Urinary Human Metabolic Individuality
Source: PubMed Central journal article supplement (PMC4564198; doi:10.1371/journal.pgen.1005487), 2015-09-09

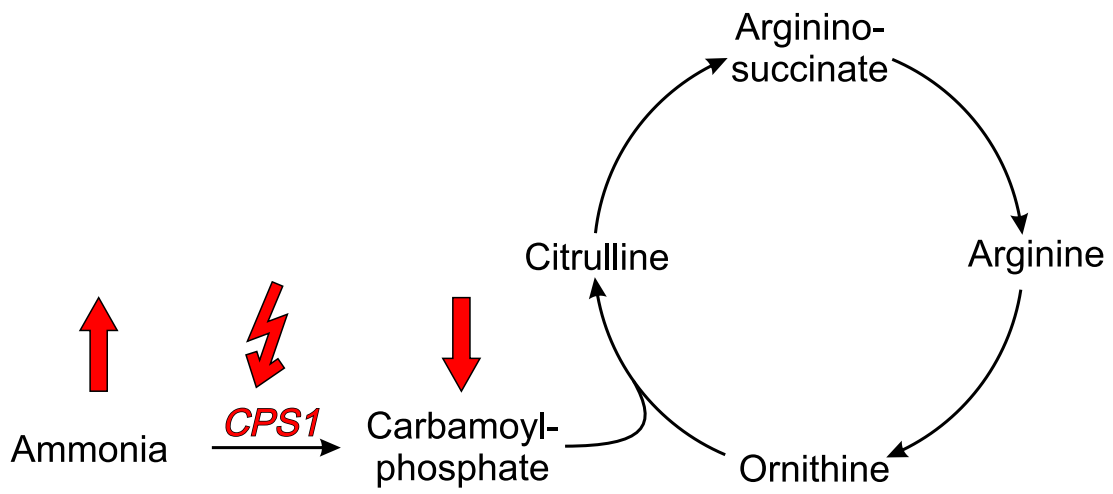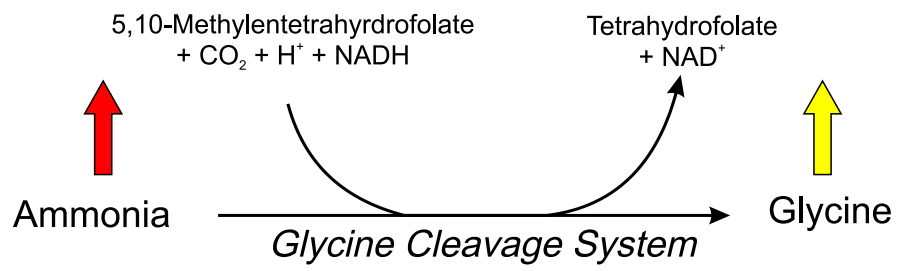

Supplement: pgen.1005487.s004.pdf [file pgen.1005487.s004.pdf]
